# 1 **Diversity and population genetic structure of the wax palm** 2 ***Ceroxylon quindiuense* in the Colombian Coffee Region**

3 Natalia González-Rivillas<sup>1-2</sup>, Adriana Bohórquez<sup>3</sup>, Janeth Patricia Gutierrez<sup>3</sup>, Víctor Hugo García-  
4 Merchán<sup>1-2</sup>

5  
6 <sup>1</sup>Grupo de Investigación en Evolución, Ecología y Conservación (EECO), Programa de Biología,  
7 Universidad del Quindío, Carrera 15 Calle 12 Norte, Armenia, Quindío, Colombia.

8 <sup>2</sup>Grupo de Investigación y Asesoría en Estadística, Universidad del Quindío.

9 <sup>3</sup> International Center for Tropical Agriculture (CIAT), Km 17, recta Cali-Palmira, Colombia.

10

11 [ngonzalezr@uqvirtual.edu.co](mailto:ngonzalezr@uqvirtual.edu.co) (NGR), [a.bohorquez@cgiar.org](mailto:a.bohorquez@cgiar.org) (AB), [j.gutierrez@cgiar.org](mailto:j.gutierrez@cgiar.org) (JPG) &  
12 [victorhgarcia@uniquindio.edu.co](mailto:victorhgarcia@uniquindio.edu.co) (VHGM).

13

14 The authors mentioned contributed equally to this work.

15

## 16 **Abstract**

17 The wax palm from Quindío (*Ceroxylon quindiuense*) is an icon of the cultural identity of the coffee growing  
18 eco-region and of all Colombia. Processes of urbanization, expansion of the agricultural and livestock area, among  
19 others, have increased its level of threat. Protecting this palm from extinction is important at an ecological level, given  
20 its function as a key species in Andean ecosystems. This work evaluated the diversity and population genetic structure  
21 of the wax palm from Quindío in five populations of the Colombian coffee region eco-region (Andean zone) by using  
22 ten microsatellite molecular markers. Two groups were identified at genetic diversity level, along with a heterozygote  
23 deficiency in all the populations possibly due to cryptic population structure effects mediated by loss of habitat. The  
24 five sampling units considered presented a total significant genetic structure, revealing a high degree of reproductive  
25 isolation. The results presented here add to the Conservation Plan for this species existing in Colombia.

26 **Key words:** Neotropical Palm, *Ceroxylon quindiuense*. Genetic variability. Microsatellites.

## 27 **Introduction**

28 Loss of habitat is the processes with the highest impact on tropical ecosystems [1]. This process has obvious  
29 effects, like modification of the landscape and local elimination of some species; but can also have effects on the long-  
30 term viability of populations of certain species due to the reduction of the number and isolation of its individuals [2].  
31 From a genetic point of view, diminished effective population size and increased degree of isolation makes the  
32 fragmented populations more susceptible to genetic drift and inbreeding, diminishing success and the evolutionary  
33 potential of the species and increasing the risk of extinction [3, 4].

34 The wax palm from Quindío (*Ceroxylon quindiuense*) is the Colombian national tree [5]; it is distributed in the  
35 country's three mountain ranges of the Andes [6], often being a dominant plant from the montane rain forest canopy  
36 and considered a key species within the ecosystems it inhabits [7]. It is a fundamental part of the structure and diversity  
37 that makes up the Colombian coffee cultural landscape, playing a crucial role as source of food for wildlife, like birds  
38 and small mammals [7, 8].

39 This species is currently in danger of extinction (EN), according to the red list of palm species [9]. Some of the threats  
40 affecting *C. quindiuense* and, generally, palms of the genus include their commercial use through extraction of leaves  
41 for the Catholic Holy Week, an activity that has been managed and reduced considerably [9]. Other threats include  
42 paddocking processes which involves the loss of habitat and low regeneration because of the introduction of other uses  
43 of the soil they occupy (mainly crops and livestock). This considerable reduction of its habitat has permitted estimating  
44 that their population has diminished by over 50% in the last three generations (210 years) [10].

45 Bearing in mind the latent threats this species has for its survival, it becomes relevant to know the effect caused by the  
46 loss of habitat on the persistence, genetic diversity, and future viability of umbrella species, like *C. quindiuense*, which  
47 currently has no defined conservation areas in Colombia. Thus, knowledge and understanding of the diversity and  
48 genetic structure of a species plays an important role for the conservation and analysis of ecological and social aspects;  
49 permitting among some points, to determine the response capacity of the populations and species against natural  
50 environmental changes or those provoked by conscious or unconscious human activities [11]. Likewise, the study of  
51 the genetic constitution of the populations and of the mechanisms of evolutionary change acting on them are the pillars  
52 that constitute the tools to confront the loss of biological diversity [12].

53 For this reason, it is important to diagnose the current situation and conservation of the wax palm from Quindío,  
54 focusing on the genetic level of distribution in the studied areas. This diagnosis will permit undertaking actions to  
55 protect this palm from extinction, adding that the main problem identified, the loss of biological diversity of the species,  
56 is the impact that can be generated in the continuity of the landscape and other species that depend on it. Likewise, *C*  
57 *quindiense* is the flagship species of the eco-region of the Colombian coffee region, a zone declared world heritage  
58 by UNESCO in 2011, which generates a big opportunity to continue with conservation efforts of the Colombian  
59 national tree.

60 In genetic structure studies on *Ceroxylon*, Gaitán [13] investigated the genetic diversity and population structure in  
61 three palm species (*C. sasaimae*, *C. alpinum*, and *Attalea amigdalina*) immersed in a fragmented landscape in the central  
62 Andes of Colombia. Evaluations of genetic diversity using microsatellite molecular markers in *C. sasaimae* and *C.*  
63 *alpinum* showed that the populations conserve high genetic diversity in spite of their restricted distribution, loss of  
64 habitat, and the low number of surviving individuals. Additionally, no significant differences were found in genetic  
65 diversity among seedlings, juveniles, and adults in any of the species studied.

66 Sanín [14] explored two aspects simultaneously, phylogeography and conservation, from microsatellites of nine  
67 populations of *C. quindiense*, *C. ceriferum*, and *C. ventricosum*, describing their diversity gradients within the context  
68 of the tropical Andes. The epicenter of the genetic diversity of the *C. quindiense* is in the Colombian central mountain  
69 range, given that both populations studied there gathered most of the alleles and the broadest allelic range. Likewise,  
70 a highly significant genetic structure was noted among all the populations, a high degree of reproductive isolation, and  
71 the almost absence of potentially mixed individuals, suggesting no recent gene flow in said populations.

72 Chacón-Vargas [15] compared the genetic diversity and population structure of three *Ceroxylon quindiense* nurseries  
73 evaluated with that of the Colombian sylvan populations from Valle de Cocora in the Department of Quindío and  
74 Toche and La Línea in the Department of Tolima. Use of microsatellite molecular markers of *C. sasaimae* and *C.*  
75 *alpinum* developed by Gaitán [13] demonstrated that the populations of this species in the central mountain range have  
76 a high genetic diversity that permits establishing potentially successful repopulation programs. This also exhibits  
77 significant genetic structuring, suggesting that we should seek the conservation of each unit that represents an  
78 independent gene pool.

79 Considering the studies mentioned, it is expected that populations of *Ceroxylon quindiense* in the Colombian coffee  
80 eco-region will be also highly structured with limited gene flow among them. This would generate patterns of low

81 genetic diversity and, with such, a high degree of inbreeding as a consequence of the loss of habitat present for this  
82 species. Due to all the aforementioned, this study evaluated the diversity and population genetic structure of the wax  
83 palm from Quindío (*Ceroxylon quindiuense*: Ceroxyloideae) in five populations of the Colombian coffee eco-region  
84 by using microsatellite molecular markers.

## 85 **Materials and Methods**

### 86 **Study area**

87 The area of the Colombian coffee region represents a set of ecosystems distributed between the central and western  
88 cordilleras of the Colombian Andes, where ecological and human complexes coexist, showing indivisibility comprised  
89 by the unit of basins with slopes and plains. This includes the snow-capped mountains; that border the biogeographic  
90 Chocó; the coffee region ecosystem, and the complex urban corridor [16], which previously only permitted designating  
91 the departments of Caldas, Quindío, and Risaralda. Now, it is used to identify a territory that, besides these three  
92 departments, covers the north of the department of Valle del Cauca and the northwest of Tolima [16]. This work  
93 included five locations distributed in the departments of Caldas, Quindío, Tolima, and Valle del Cauca (Fig 1).

94 **Fig 1. Locations for sampling of the wax palm from Quindío (*Ceroxylon quindiuense*) in the coffee area eco-**  
95 **region: Circle (Valle de Cocora, Salento, Quindío, 2300-2900 masl); Square (Anaime, Cajamarca, Tolima. 2000-**  
96 **3000 masl); Star (Tenerife, Valle del Cauca. 2500-2600 masl); Asterisk (San Félix, Salamina, Caldas. 2800 masl);**  
97 **Triangle (Pijao, Quindío. 2600-3000 masl)**

### 98 **Sampling design and collection of plant material**

99 Ten individuals were collected for each of the three development stages, seedlings, juveniles – less than 10 m high –  
100 and adults – with prior corroboration of the reproductive state of *C. quindiuense* (Fig 2) in wooded areas with different  
101 degrees of intervention, defined as the size of each of the patches chosen. For each of the individuals sampled, the  
102 corresponding coordinates were taken with the aid of an Etrex global positioning system. The study avoided collecting  
103 nearby individuals to discard bias in the diversity analysis caused by kinship under the closest neighbor model, taking  
104 100 m as the minimum distance between individuals.

105 **Fig 2. Representatives of each of the three development stages of wax palm from Quindío (*Ceroxylon***  
106 ***quindiense*) sampled. A. Seedling, B. Juvenile, C. Adult**

107 The plant material collected in the three development stages were tender leaves stored in tightly sealed bags containing  
108 silica gel in 1:5 proportion (tissue: silica) to accelerate dehydration of the tissues. Collection of the adult individuals  
109 was conducted by scaling to the crowns of the palms and collecting (inasmuch as possible) the tenderest leaves from  
110 the adults. Certified personnel carried out this activity with all the stipulated security measures. All the procedures  
111 carried out in the field and access to the genetic resource followed the guidelines defined in the resolution by the entity  
112 responsible for it, *Corporation Autónoma Regional from Quindío* (CRQ), No. 1136 of December 31, 2012 and Decrees  
113 1376 and 1375 of the Ministry of the Environment and Sustainable Development, both from 27 June 2013, respectively.

## 114 **DNA Extraction**

115 The DNA was extracted by taking 1g of previously macerated tissue from the leaf collected and using the Qiagen  
116 DNeasy Plant Mini kit (Qiagen, Ltd.), following the protocol proposed by the manufacturer. The concentration of the  
117 material extracted in ng/μL was determined by using NanoDrop 1000 Spectrophotometer V3. The DNA visualization  
118 was carried out through agarose gel at 1% stained with the SYBR® Safe colorant by Invitrogen, using 3 μl of DNA  
119 and 2 μl of Blue Juice. Thereafter, dilutions were made of said material at a concentration of 8 ng/ml at a final volume  
120 of 50 μl and stored at -20 °C.

## 121 **Evaluation and amplification of loci microsatellites**

122 Ten loci microsatellites (SSR) were evaluated, which were developed by Gaitán [13] for the species of the genus  
123 *Ceroxylon alpinum* and *C. sasaima* (Table 1).

124 **Table 1. Loci microsatellites used and annealing temperature of each evaluated in five populations of wax**  
125 **palm from Quindío (*Ceroxylon quindiense*).**

| Loci<br>microsatellite | Primer L 5'-3'       | Primer R 5'-3'         | Annealing<br>temperature<br>(°C) |
|------------------------|----------------------|------------------------|----------------------------------|
| Ca7                    | TCTCCCACTTGTGACCA    | CAAGGTCCAATGAAGGCTGC   | 48                               |
| Ca16                   | TTGTAGACTCACGTCCAGTT | TGACAACCTTCACTCTTT     | 48                               |
| Ca17                   | CAGACATTGGCTTCAAACA  | ATGCGCTTATTTCTGTTCTC   | 48                               |
| Ca20                   | GTATTCCAAGCCATTTC    | CAGAGAGATAGAAAACCAAAGC | 50                               |

|      |                       |                      |    |
|------|-----------------------|----------------------|----|
| Ca25 | AATTCATACGTGCGCCCTGAG | CCGCCGTGACTCTCCTTAGC | 48 |
| Ca30 | TCCCAGTCAGAGAATACATC  | CTTGTTCTACCTGCCATG   | 50 |
| Cs3  | GAATGTGACCATCTGCTA    | AAATGTAGAGGAATTGCAT  | 50 |
| Cs5  | GCATTGTGAGAGCAAGTGC   | GAAACCACCAATCCTCCTTT | 50 |
| Cs24 | CGTGTCTTCACCAGAGTGTCG | ACCGTCGTTTCATGGCACCA | 50 |
| Cs30 | GTGCGCCACATGGAACCTAA  | CGAAGCCATCTGCATGGA   | 48 |

---

126 Each loci used was diluted by using 10  $\mu$ l of the primer and 90  $\mu$ l of sterile water. Each amplification reaction through  
127 PCR used 25  $\mu$ l of final volume, consisting of: 5  $\mu$ l of DNA (8 ng/ $\mu$ l), 12.5  $\mu$ l of GoTaq<sup>®</sup> Colorless Master Mix by  
128 Promega Ltd, 1  $\mu$ l of primer L-R and 5.5  $\mu$ l of water free of nucleases by Promega Ltd. The DNA and the GoTaq<sup>®</sup>  
129 Colorless Master Mix were kept in ice when out of the refrigerator to avoid degradation at ambient temperature.  
130 Amplifications were carried out in a PTC-100 thermocycler (MJ Research) using the following amplification program:  
131 94 °C (4 min), [94 °C (15 s), annealing temperature 46-50 °C (15 s), 72 °C (5 min)] for 35 cycles, 72 °C (5 min), 10  
132 °C ( $\infty$ ). The subsequent visualization of the PCR products was conducted in agarose gels at 3% (5  $\mu$ l PCR product +  
133 3  $\mu$ l Blue Juice).

## 134 **Amplification of fluorescent microsatellites**

135 Amplification of the microsatellites for their subsequent analysis was via the automated fragments analysis  
136 methodology, based on the detection of fluorescent colorants that permits rapid selection of polymorphic sequences to  
137 multiple genomic loci [17]. To reduce the cost of genotyping with microsatellites marked with fluorescence, Oetting  
138 *et al.* [18] proposed a PCR strategy called multiplex with primers or tail primers, which employs a *forward* primer  
139 with an additional extension of 18 pb in its 5' extreme that belongs to the M13 primer (TGTAACACGACGGCCAGT),  
140 a *reverse* primer without altering, and a third universal M13 primer marked with fluorescence.

141 Amplifications for the microsatellites with end labeling were carried out on 96-well plates. The cocktail for PCR used  
142 per reaction was conducted at a final volume of 20  $\mu$ l, mixing 5  $\mu$ l of DNA (8 ng/ $\mu$ l); 1X buffer; dNTP 0.3 mM;  
143 magnesium chloride (MgCl<sub>2</sub>) 3.5 Mm; 0.1 pmol/ $\mu$ l of the M13 primers marked with fluoro-chrome and *reverse*; 0.05  
144 pmol/ $\mu$ l of the *forward* primer with the M13 sequence; and 0.5 U of *Taq pol.* The quality of the products amplified  
145 was verified in agarose gels at a concentration of 1.5%, taking 5  $\mu$ l of product and 3  $\mu$ l of Blue Juice.

146 Upon obtaining all the amplification products, the mixture was made according to the size range in base pairs of the  
147 microsatellites. These mixtures were carried out on 96-well skirt plates, which combined the PCR product of the  
148 primers selected for each of the combinations taking a 2- $\mu$ l aliquot of each product amplified to be sent to Cornell

149 University (Ithaca, NY. USA) and its subsequent analysis through the Applied Biosystem 3730xl DNA sequencer  
150 (Applied Biosystem).

## 151 **Data analysis**

152 The size of the alleles, in base pairs, was estimated through the GeneMarker software v.2.6.7 (SoftGenetics, State  
153 College, PA). A matrix of individuals and microsatellites was generated, indicating the diploid genotypes for each  
154 marker. To test the adequate assignment of the genotypes, the AlleloBin program (ICRISAT) was used for each. This  
155 program tested if the sizes of fragments observed adjusted to the size of alleles expected, based on the units of length  
156 repeated in the microsatellite [19].

## 157 **Structure and diversity analysis**

158 The allele frequencies, the observed heterozygosity ( $H_O$ ) and expected ( $H_E$ ) per locus and per population were  
159 calculated by using the GeneAEx 6.41 software [20]. Deviations from the Hardy-Weinberg Equilibrium (HWE) and  
160 the linkage disequilibrium were evaluated for each locus using the GENEPOP software v. 4.1 [21], employing  
161 Markov's chain method with 5000 iterations and following the algorithm by Guo and Thompson [22].

162 Genetic divergence among populations was estimated by calculating the classical approach of the  $F_{ST}$  and the likelihood  
163 ratio logarithm (G test) to evaluate population differentiation through Markov chain algorithms, as implemented in the  
164 GENEPOP software [23, 24]. Although  $F_{ST}$  has been widely used as a measure of population structure, it has recently  
165 come under criticism due to its dependence on the intra-population heterozygosity [25]. Hence, the population  
166 differentiation was also estimated by using the  $D_{ST}$  statistics, which more precisely reflects the genetic differentiation  
167 among populations because it includes a multiplicative partition of the diversity, based more on the number of alleles  
168 than on the heterozygosity expected [25]. For its calculation, the DEMETics package [26] was used from R v.3.3.1  
169 [26], with a bootstrap method of 1000 repetitions to estimate the level of significance [27]. An analysis of isolation by  
170 distance was performed through a Mantel test [28], correlating the geographic and genetic distances ( $F_{ST}$  and  $D_{ST}$ )  
171 using the GenAlex 6.41 software [20].

172 The identification of the number of genetically differentiated groups was carried out using the Bayesian clustering  
173 method [29] implemented in STRUCTURE, version 2.3.3, and the discriminant analysis of principal components  
174 (DAPC: [31]) available in the adegenet package [30] for R, version 3.3.1 [26]. Both methods do not require *a priori*  
175 delineation of genetic clusters and are suitable for analyzing spatially continuous data [29, 31]. However, some

176 differences exist in the analytical approaches between the two methods. STRUCTURE attempts to cluster individuals  
177 by minimizing Hardy–Weinberg and gametic disequilibrium [29], and typically fails to identify some complex types  
178 of spatial structure such as isolation-by-distance [31] and hierarchical population structure [32]. The multivariate  
179 analysis used in DAPC does not make any assumption on the population genetic models and may be more efficient at  
180 identifying genetic clines and hierarchical structure [31]. The two dissimilar approaches were used in this study,  
181 because various clustering approaches may lead to different conclusions [e.g. 33-35].

182 For DAPC, the data were scaled and all the data lost (absent) were replaced with the value of the median (origin of the  
183 X and Y axes). A number of principal components (PCs) were considered as predictors for the DA. Nevertheless, no  
184 strict criterion exists to determine how many PCs/DAs must be considered during this dimension reduction step,  
185 beyond considering the statistical power that implies having the highest possible amount of PCs/DAs and the stability  
186 of the assignments carried out [31]. This study considered 42 PCs and 2 DA, containing 80% of the total genetic  
187 information. For this analysis, the populations genotyped were used *a priori* to assign the genotypes. The discriminant  
188 functions and the genotypes of the microsatellites were visualized as diagrams created with the *scatter.dapc* function  
189 in the R “adegenet” package [30, 31].

190 Likewise, an analysis based on a Bayesian model implemented in software STRUCTURE v. 2.3.3 [29] was used to  
191 estimate the number of groups (K) represented by all sampled individuals and individuals mixture proportions. The  
192 number of groups was inferred using 10 independent simulations with Markov chains 100000 (MCMC), following the  
193 model that allows the origin of individuals from mixed populations with correlated allele frequencies and using the  
194 locality as *a priori* information to help identify groups. The range of K groups to be analyzed for between 1 and 10.  
195 The most likely K was estimated using Evanno’s DK [32], which was implemented in Structure Harvester [36].

## 196 **Results**

### 197 **Genetic variability of *Ceroxylon quindiuense***

198 In the five locations sampled (Cocora, Anaime, Pijao, San Félix, and Tenerife), 237 alleles were identified in the 10  
199 loci studied for 126 individuals. The range of alleles per locus varied from 11 to 35. The Ca17 and Cs03 loci presented  
200 the highest number of alleles observed for all the locations (35 and 30, respectively). Locus Ca07 presented the lowest  
201 number of alleles observed (11). In Cocora, the minimum number of alleles was seven (locus Ca07); six in Anaime



202 (locus Ca07); four in Pijao (locus Ca16); five in San Félix (locus Cs24) and five in Tenerife (locus Ca30). The number  
203 of alleles observed in Cocora was 117; 101 in Anaime; 95 in Pijao; 116 for San Félix and 119 in Tenerife (Fig 3).

204 **Fig 3. Number of alleles for the 10 loci microsatellites evaluated in five populations of wax palm from Quindío**  
205 **(*Ceroxylon quindiuense*)**

206 In general, the allele frequencies for the 10 microsatellites presented a similar distribution with frequencies between  
207 10 and 30%; however, frequencies above 50% were identified in four locations (Anaime, Pijao, San Félix, and  
208 Tenerife) and frequencies below 42% in the population of Cocora. Allele 142 in loci Ca30 and Ca20 presented allele  
209 frequencies above 50% in the locations of Anaime and San Félix. Likewise, allele 216 showed an allele frequency  
210 above 50% for locus Cs05 in the location of Pijao. The highest allele frequency registered was evidenced for allele  
211 117 and 145 of the loci Ca30 and Ca25, respectively, in Tenerife.

212 **Observed heterozygosity and expected, effective number of alleles**  
213 **(*Ne*), HWE deviations, and private alleles**

214 In genetic diversity, two groups were found: San Félix, Anaime, and Pijao comprised the first with an observed  
215 heterozygosity (*Ho*) of 0.343 and Cocora and Tenerife comprised the second with *Ho* of 0.216. The expected  
216 heterozygosity (*He*) fluctuated between 0.739 (Tenerife) and 0.828 (Anaime/Cocora). The fixation index (*F*) varied  
217 between 0.509 (San Félix) and 0.772 (Tenerife) (Table 2). A total number of homozygote genotypes of 256 and 196,  
218 respectively, was registered for Tenerife and Cocora (populations with higher *F*). The 10 loci evaluated were 100%  
219 polymorphic. The effective number of alleles (*Ne*), defined, as the required number of alleles with equal allele  
220 frequency to predict the heterozygosity, was determined for each locus in all the locations evaluated. The *Ne* fluctuated  
221 between 6.572 (San Félix) and 7.247 (Cocora).

222 **Table 2.** Number of individuals samples (*n*), mean values of fixation index (*F*), observed heterozygosity (*Ho*),  
223 expected heterozygosity (*He*), and number of alleles for the 10 loci evaluated in five populations of wax palm from  
224 Quindío (*Ceroxylon quindiuense*)

| Population | n  | F     | Ho    | He    | Number of alleles |
|------------|----|-------|-------|-------|-------------------|
| San Félix  | 30 | 0.509 | 0.390 | 0.803 | 116               |
| Anaime     | 20 | 0.609 | 0.310 | 0.828 | 101               |

|          |    |       |       |       |     |
|----------|----|-------|-------|-------|-----|
| Cocora   | 26 | 0.704 | 0.283 | 0.828 | 117 |
| Pijao    | 20 | 0.573 | 0.330 | 0.804 | 95  |
| Tenerife | 30 | 0.772 | 0.150 | 0.769 | 119 |

225 Globally, the value of the inbreeding coefficient ( $F_{IS}$ ) was positive and highly significant ( $p \leq 0.001$ ) for all the  
 226 populations evaluated when considering all the loci, indicating that said populations presented a defect of heterozygotes  
 227 and, hence, are not in Hardy-Weinberg Equilibrium. The value of  $F_{IS}$  was 1 for locus Ca25 in four populations (Cocora,  
 228 Anaime, Pijao, and San Félix), for locus Ca17 in Anaime, and loci Ca07 and Cs30 in Tenerife, indicating that there  
 229 are only homozygote individuals for these loci.

230 The private alleles (unique) were 17 for Cocora, 16 for Anaime and Pijao, 21 for San Félix, and 35 for Tenerife (Fig  
 231 4). For the populations of Cocora and Pijao, locus Ca17 showed the highest value with five private alleles, in Anaime  
 232 loci Ca17 and Ca20 with four, in San Félix locus Ca25 with six, and for Tenerife loci Cs03 and Ca20 with 12 private  
 233 alleles recognized (Fig 5).

234 **Fig 4. Total number of private alleles (unique) for five populations of wax palm from Quindío (*Ceroxylon***  
 235 ***quindiense*)**

236 **Fig 5. Total number of private alleles (unique) for each of the 10 loci evaluated in five populations of wax**  
 237 **palm from Quindío (*Ceroxylon quindiense*)**

## 238 Genetic population structure of *Ceroxylon quindiense*

239 The five sampling units considered in this study had a total significant genetic structure and by pairs of populations.  
 240 The population of Tenerife showed the highest values of differentiation for both structure indices ( $F_{ST}$  and  $D_{ST}$ ) with  
 241 respect to the rest. The populations of Pijao and Anaime had the lowest values for both indexes; nonetheless, they were  
 242 also significant (Table 3). Analysis of seedlings and juveniles for all the populations presented no significant  
 243 differences within each population ( $p > 0.05$ ).

244 **Table 3.** Genetic structure indexes among the five populations of wax palm from Quindío (*Ceroxylon quindiense*).  
 245  $F_{ST}$  below the diagonal ( $p < 0.05$ ) and  $D_{ST}$  above the diagonal ( $p < 0.001$ ).

|  |        |        |       |           |          |
|--|--------|--------|-------|-----------|----------|
|  | Cocora | Anaime | Pijao | San Félix | Tenerife |
|--|--------|--------|-------|-----------|----------|

|           |       |       |       |      |      |
|-----------|-------|-------|-------|------|------|
| Cocora    |       | 0.21  | 0.22  | 0.24 | 0.49 |
| Anaime    | 0.036 |       | 0.15  | 0.34 | 0.58 |
| Pijao     | 0.041 | 0.027 |       | 0.27 | 0.64 |
| San Félix | 0.042 | 0.063 | 0.054 |      | 0.56 |
| Tenerife  | 0.096 | 0.12  | 0.14  | 0.12 |      |

246 The analysis of isolation by distance through the Mantel test was not significant for  $D_{ST}$  or for  $F_{ST}$  vs. geographic  
 247 distances. The DAPC permitted identifying three genetic groups in which, nonetheless, a mixture of individuals is  
 248 found from different populations, except for a group that presents in its majority individuals from the population of  
 249 Tenerife (Fig 6). For other hand, Bayesian analysis using STRUCTURE identified two cluster (K=2), reflecting a small  
 250 mix of individuals between clusters (Fig 7).

251 **Fig 6. Discriminant analysis of principal components with three groups (*k-means*). Genetic profile based on 10**  
 252 **microsatellites, 126 individuals collected in five populations of wax palm from Quindío. Each individual per**  
 253 **population is represented by a specific symbol and color. Ellipses only permit showing the differentiation of the**  
 254 **three groupings identified**

255 **Fig 7. Graphical representation of the genetic composition of all individuals evaluated. Analysis of group**  
 256 **membership for all individuals. The colors represent the genetic groups, such that the color ratio for each**  
 257 **individual indicates their probability of assignment to the genetic cluster**

## 258 Discussion

259 In this study, the wax palm from Quindio and Colombian national tree, *Ceroxylon quindiuense*, showed variable  
 260 patterns of genetic diversity and significant genetic differentiation at structure level in the natural populations evaluated  
 261 from the eco-region in Colombia's coffee growing area. Two groupings were identified in genetic diversity. The first,  
 262 constituted by the populations of Cocora and Tenerife, characterized for presenting low diversity with lower values of  
 263 observed heterozygosity ( $H_o$ ) and high fixation index ( $F$ ); the second was made up of the populations of Anaime,  
 264 Pijao, and San Félix, exhibiting high diversity and higher  $H_o$ , and a lower value of  $F$  (Table 2).

265 Previous studies have registered that diversity in terms of observed heterozygosity for *C. quindiuense* populations,  
266 such as Cocora, has been higher than that identified in this study ( $H_o = 0.467$ ), as well as in other populations of this  
267 species, like Tolima ( $H_o = 0.51$ ), Antioquia ( $H_o = 0.536$ ), and Santander ( $H_o = 0.450$ ) [37, 15]. Features such as  
268 allelic range, the effective number of alleles ( $N_e$ ), and heterozygosity values suggest a high genetic diversity for  
269 populations of wax palm from Quindío, a pattern explained as a result of the long-life cycle of the species and its  
270 ability to survive for more than 120 years after deforestation [10], in addition to the sexual system that is present the  
271 species.

272 However, a high percentage of populations with heterozygote deficiency has been determined for this species [14] and  
273 for others from the genus *Ceroxylon*, such as *C. alpinum*, *C. sasaima* [13], and *C. equinulatum* [38]. This agrees with  
274 the inbreeding coefficient values ( $F_{IS}$ ) determined in this study, thus, identifying heterozygote deficiency in all of the  
275 populations studied.

276 In the natural populations, heterozygote deficiency is generally attributed to aspects like selection of loci, selection  
277 against heterozygotes, and inbreeding [39]. Nevertheless, for *C. quindiuense* it is assumed to be generated through a  
278 phenomenon known as cryptic population structure [14], where the gene flow in a subdivided population is hindered  
279 by the existence of geographic barriers, habitat fragmentation, among others; with fragmentation being one of the  
280 principal threats to which all the populations of this species are subjected. Galeano et al. [9] state in the Conservation  
281 Plan for said species, that a considerable portion of the individuals that exist survive in paddocks. A large proportion  
282 of individuals is found in relatively small forest fragments, whose long-term permanence is not guaranteed.

283 The impact of loss of habitat due to human activities is reflected on the structure and on the amount of genetic variation  
284 of the populations [40], as observed in this study and in other studies developed for this species, identifying a high  
285 degree of inbreeding. Seed dispersion is an important process for the dynamics of the populations because it combines  
286 demographic and genetic effects [41]. A scenario of dispersion limitation due to fragmentation may lead to diminishing  
287 the effective number of parentals at a brief temporal scale and increasing the genetic drift in successive generations,  
288 especially when dominant mothers exist with a high gametic contribution (*i.e.*, correlated maternity) or events of  
289 correlated dispersion [42, 43].

290 Dispersion through grains of pollen is also a mechanism that is a fundamental part in the gene flow of plant species;  
291 fragmentation of the habitat has also been postulated as a negative effect on populations of wild pollinators, but to

292 date, relatively few studies exist on the effects of fragmentation on pollination by itself. Pollination in *C. quindiuense*  
293 is conducted by several species of nitidulid beetles of the tribe Mystropini [44], which consume floral parts and pollen.  
294 They masticate while remaining in the inflorescence; part of the pollen is adhered to their bodies and they then transfer  
295 it to another inflorescence.

296 The relationship between the wax palm from Quindío and said beetles, as well as the effect of fragmentation in this  
297 process, are aspects still not studied. However, it has been recorded that many species of pollinators, like the  
298 nitidulidae, would have sufficient flight capacity [45-47]; to be able to displace between sites crossing the matrix that  
299 surrounds the fragments and, thus, exploit the floral resources available in the different forest sites. It has been shown  
300 that local populations of pollinators would have the capacity to survive and remain in each site, independent of their  
301 flight capacity and, hence, would not be greatly affected by the diminished area [48]. Effective dispersion mechanisms  
302 at medium and long distance can permit relatively high levels of gene flow in fragmented systems, while restricted  
303 dispersion systems, or those failed over time and/or space, can cause interruption of the genetic connectivity [49].  
304 Although the pollen dispersion (haploid) at long distance is translated into an important genetic connectivity  
305 mechanism, the limitation in seed dispersion (diploid) implies limitation in gene distribution – both maternal and  
306 paternal [41].

307 *C. quindiuense* has a strong genetic structure with all the populations differentiated, yielding significant structuring  
308 values (Table 3); results agreeing with previous studies in populations, like Cocora (Quindío), Roncesvalles, Toche,  
309 and la Línea (Tolima), Jardín (Antioquia) and Zapatoca (Santander) [14,15]. This fact reveals a high degree of  
310 reproductive isolation for the wax palm populations. Said degree of reproductive isolation identified between these  
311 populations is not associated directly to phenomena of isolation by distance. Nevertheless, Sanín et al. [37] state that  
312 *C. quindiuense* populations, as well as those of other species of the genus, are genetically isolated as result of their  
313 phylogeographic history occurring throughout the formation of the Andes and their migration processes.

314 Even so, it is evident that the current state of conservation of its habitat is influenced considerably in said structuring,  
315 where landscape characteristics may modify gene flow between population pairs, directly when affecting the dispersion  
316 rates between them, or indirectly upon affecting the spatial disposition of the dispersion rates and among the  
317 subpopulations intervened [50]. For *C. quindiuense*, the isolation by resistance (IBR) model can be applied [50]. It is  
318 a method designed to predict the effects of the landscape's structure on the equilibrium of the genetic structuring in

319 natural populations, incorporating the landscape's heterogeneity within the analysis of gene flow and of genetic  
320 differentiation evaluated for this species.

321 Landscapes associated to the wax palm from Quindío are characterized for undergoing diverse transformation  
322 phenomena that has turned them into heterogeneous landscapes, reporting that the populations from the nation's central  
323 mountain range have been deforested principally during the 1900s, during a process of landscape transformation called  
324 "Paisa Colonization" [37]. This has given way to the current existence of a landscape with forest fragments of diverse  
325 sizes, large areas of paddocks and/or of diverse crops. Using the IBR model might permit predicting the patterns of  
326 movement and the probabilities of successful dispersion of *C. quindiuense* through complex landscapes, like those  
327 presented, to generate connectivity measures, define isolation of the patches or populations, and identify important  
328 connective elements (for example, corridors) to plan their conservation [51].

329 Although prior studies have reported the near absence of individuals potentially mixed in this species suggesting no  
330 recent gene flow [14], the DAPC conducted in this study demonstrates the presence of mixed individuals among the  
331 three groupings identified. This aspect is possibly related to the fact that both slopes of the central mountain range  
332 have served as migrant receptors and, hence, it is where the gene flow has historically converged from the north and  
333 south of the species distribution [37]. This result highlights the importance of evaluating three components that  
334 principally make up the gene flow, namely: a spatial component (distance), a bioclimatic component (habitat), and a  
335 biological component, as studied in *C. echinulatum* [38] that permit determining a possible gene flow dynamic that  
336 would give way to increased genetic variation among the populations.

337 It was identified that the population of Tenerife had the highest number of private alleles, the lowest levels of genetic  
338 diversity (Table 2), and significant structuring with respect to the other populations (Table 3); even the majority of  
339 individuals formed one of the groupings identified in the DAPC (Figure 6) and the STRUCTURE analysis (Figure 7).  
340 This population has not been studied previously; however, its low genetic diversity and population genetic structure  
341 may be attributed to historical and contemporary processes of colonization (i.e. expansion of the agricultural, livestock  
342 area and processes of urbanization), which has led to the isolation, as it has been reported by Sanin et al. [37] in other  
343 populations of *Ceroxylon*.

344 The genetic structure of a population is determined by its evolutionary history and expresses the amount of genetic  
345 diversity it shelters and how it is distributed within the population [52]. It was possible to determine that the significant

346 structuring levels from Tenerife, as named, cannot be attributed to the considerable geographic distance where the  
347 other populations studied are found, proving through the analysis performed of isolation by distance. In addition to  
348 current processes, the inbreeding phenomenon that has occurred with the other populations was evaluated. With this  
349 being an almost completely deforested zone, with livestock and crops of scallions, banana passion fruit (curuba),  
350 blackberry, and potato, etc., which makes it the first agricultural pantry in Valle del Cauca, containing fragments of  
351 wasteland and very disturbed forest [10]. Thus, it may be inferred that this population has undergone processes at local  
352 scale, like the lack of dispersers that distribute the seeds within the forest, thereby generating the need to conduct  
353 studies to assess the behavior of the dispersers after destruction and fragmentation events of this and all the populations  
354 of *C. quindiuense*.

355 The genetic criteria obtained from the study of molecular markers could be useful to select wildlife populations as  
356 candidates with priority for their conservation [53]. As the case of the populations of wax palm from Tolima and  
357 Quindío for which Sanín [14] states that the huge genetic diversity available in these populations, in spite of the current  
358 loss of habitat, may serve this species as source to repopulate in case of an eventuality that causes local extinctions in  
359 the satellite populations. However, it is important to remember that the small populations or satellites of wax palm  
360 from Quindío, as well as Tenerife, present important distinguishable genetic patterns such as their low observed  
361 heterozygosity, their high values of homozygotes and fixation index, and their higher number of private alleles. Finally,  
362 we recommend using methods based on phylogeography and molecular phylogenetics that help to reconstruct historical  
363 patterns that have led to the current geographic distribution [54-56]. In said scenario, the wax palm from Quindío  
364 represents an excellent model to carry out these types of studies that explain processes of historical species  
365 diversification in the Andes.

366 This study is, to date, the first work at genetic level developed for the populations of San Félix, Anaime, Tenerife, and  
367 Pijao that contributes to one of the first lines of action of the Conservation Plan for this Andean palm in Colombia,  
368 broadening the knowledge base in this species. Thus, we recommend considering the genetic diversity identified for  
369 said satellite populations and associating them to the other populations studied to generate a complete diagnosis that  
370 permits its conservation on both sides of the central mountain range, as suggested in the Conservation Plan. Likewise,  
371 these results will permit complementing the conservation actions proposed in this document, such as the preservation  
372 and restoration of its habitat, with greater focus on the interconnection among forest fragments and populations through  
373 the renovation of palm groves in the paddocks and forested areas. This should lead to increasing its distribution area

374 and diminishing vulnerability to local extinction of satellite populations; adding aspects related to protection of the  
375 local dispersers that play an important role in gene flow.

## 376 Acknowledgments

377 This research was funded by project 673 of the Vice-rectory of Research at Universidad del Quindío. Gratitude is also  
378 expressed to the International Center for Tropical Agriculture and especially to Dr. Joe Thome and to Johan Carvajal  
379 and Jessie Ortiz for their support in the fieldwork. We also thank Alicia Knudson for improving the English of this  
380 manuscript.

## 381 References

- 382 1. Gascon C, Bierregaard R, Laurance W, Rankin-de Mérona J. Deforestation and forest fragmentation in the  
383 Amazon. In: Bierregaard RJ, Gascon C, Lovejoy T, Mesquita R, editors. Lessons from Amazonia: the ecology  
384 and conservation of a fragmented forest. New Haven. Yale University; 2012. p. 22-30.
- 385 2. Boshier DH. Agroforestry systems: important components in conserving the genetic viability of native  
386 tropical tree species? In: Schroth G, Fonseca GAB da, Harvey CA, Gascon C, Vasconcelos H, Izac A, editors.  
387 Agroforestry and biodiversity conservation in tropical landscapes. Washington, DC: Island Press; 2004. p.  
388 290-313.
- 389 3. Ellstrand NC, Elam DR. Population genetic consequences of small population size: implications for plant  
390 conservation. Annual Review of Ecology and Systematics. 1993; 24:217-242.
- 391 4. Young A, Boyle T, Brown T. The population genetic consequences of habitat fragmentation for plants. Trends  
392 Ecol. Evol. 1996; 11:413-418.
- 393 5. Congreso de Colombia. Ley 61 de 1985 por la cual se adopta la palma de cera (*Ceroxylon quindiuense*) como  
394 Árbol Nacional. Bogotá: Diario Oficial. 37152 (Sep. 16, 1985).
- 395 6. Bernal R, Torres C, García N, Isaza C, Navarro J, Vallejo MI, et al. Palm Management in South America.  
396 Bot. Rev. 2011;77: 607-646
- 397 7. Sanín MJ, Galeano G. A revision of the Andean wax palms, *Ceroxylon* (Arecaceae). Phytotaxa. 2011; 34: 1-  
398 64.
- 399 8. Henderson AJ, Galeano G, Bernal R. Field guide to the palms of the Americas. Princeton University Press,  
400 Nueva Jersey. 1995. 352 pp.
- 401 9. Galeano G, Bernal R. Palmas. In: Calderón E, Galeano G. & N. García, editors Libro Rojo de Plantas de  
402 Colombia. Volumen II: Palmas, frailejones y zamias. Instituto Alexander von Humboldt, Instituto de Ciencias  
403 Naturales-Universidad Nacional de Colombia, Ministerio de Ambiente, Vivienda y Desarrollo Territorial,  
404 Bogotá. 2005. p. 59-223.
- 405 10. Ministerio de Ambiente y Desarrollo Sostenible. Plan de Conservación, manejo y uso sostenible de la palma  
406 de cera del Quindío (*Ceroxylon quindiuense*), árbol nacional colombiano. Textos: Bernal R., G. Galeano, M.



- 407 J. Sanín. Ministerio de Ambiente y Desarrollo Sostenible - Universidad Nacional de Colombia, Bogotá. 2015.  
408 80 pp.
- 409 11. Piñero D. La diversidad genética como instrumento para la conservación y el aprovechamiento de la  
410 biodiversidad: estudios en especies mexicanas. In: Capital natural de México. Vol. 1: Conocimiento actual de  
411 la biodiversidad. México: CONABIO. 2008. pp. 437-494
- 412 12. Caballero A. Genética de la conservación: Aplicación de los conceptos de la evolución a la conservación de  
413 la diversidad biológica. *Métode Science Studies Journal*. 2014; 4: 73-77
- 414 13. Gaitán E. Obtención y uso de secuencias micro satelitales GA/CA en estudios de diversidad genética en las  
415 especies de palmas colombianas *Ceroxylon sasaimae*, *Ceroxylon alpinum* y *Attalea amygdalina*  
416 [dissertation]. Universidad Nacional de Colombia, Palmira (Colombia). 2003
- 417 14. Sanín MJ. Estudios ecológicos y evolutivos en *Ceroxylon* (Palme: Ceroxiloideae) [dissertation]. Universidad  
418 Nacional de Colombia. Facultad de Ciencias. Departamento de Biología. Bogotá (Colombia). 2013.
- 419 15. Chacón-Vargas K. Evaluación y caracterización genética de tres viveros de palma de cera (*Ceroxylon*  
420 *quindiuense*) (H.Karts.) H.Wendl en el Departamento del Quindío [dissertation]. Programa de Biología:  
421 Universidad del Quindío; 2015.
- 422 16. Duis U, Saldarriaga C, Zuluaga V. Guía para la integración del Plan de manejo del paisaje cultural cafetero  
423 en el Ordenamiento Territorial. Universidad Tecnológica de Pereira. Red Alma Máter; 2010. 55 pp.
- 424 17. Londoño JM. Estructura poblacional y diversidad genética de frijol común (*Phaseolus vulgaris*) en 202  
425 genotipos por medio de SSR fluorescentes [dissertation]. Programa de Biología: Universidad del Quindío.  
426 2011.
- 427 18. Oetting WS, Lee HK, Flanders DJ, Weisner GL, Sellers TA, King RA. Linkage analysis with multiplexed  
428 short tandem repeat polymorphisms using infrared fluorescence and M13 tailed primer. *Genomics*. 1995;  
429 30:450-458.
- 430 19. Idury RM, Cardon LR. A Simple Method for Automated Allele Binning in Microsatellite Markers. *Genome*  
431 *Research*. 1997; 7: 1104-1109.
- 432 20. Peakall R, Smouse PE. GenAlEx 6.5: genetic analysis in Excel. Population genetic software for teaching and  
433 research – an update. *Bioinformatics*. 2012; 28: 2537-2539.
- 434 21. Rousset F. Genepop'007: a complete reimplementation of the Genepop software for Windows and Linux. *Mol.*  
435 *Ecol. Resources*. 2008; 8: 103–106.
- 436 22. Guo SW, Thompson EA. Performing the exact test of Hardy–Weinberg proportion for multiple alleles.  
437 *Biometrics*. 1992; 48:361–372.
- 438 23. Wright JS. Tropical forests in a changing environment. *Trends Ecol. Evol.* 2005; 20, 553–560.
- 439 24. Weir BS, Cockerham CC. Estimating F-statistics for the analysis of population structure. *Evolution*. 1984;  
440 38:1358–1370.
- 441 25. Jost L. GST and its relatives do not measure differentiation. *Mol. Ecol.* 2008; 17: 4015–4026.
- 442 26. R Development Core Team. R: A Language and Environment for Statistical Computing. R Foundation for  
443 Statistical Computing, Vienna, Austria. 2014.
- 444 27. Manly BF. Randomization, Bootstrap and Monte Carlo Methods in Biology. Chapman & Hall, London. 1997.  
445 480 pp

- 446 28. Mantel N. The detection of disease clustering and generalized regression approach. *Cancer Res.* 1967; 27:209-  
447 220.
- 448 29. Pritchard JK, Stephens M, Donnelly P. Inference of population structure from multilocus genotype data.  
449 *Genetics*, 2000; 155: 945–959.
- 450 30. Jombart T. adegenet: an R package for the multivariate analysis of genetic markers. *Bioinformatics.* 2008;  
451 24: 1403-1405.
- 452 31. Jombart T, Devillard S, Balloux F. Discriminant analysis of principal components: a new method for the  
453 analysis of genetically structured populations. *BMC Genetics.* 2010; 11-94
- 454 32. Evanno G, Regnaut S, Goudet J. Detecting the number of clusters of individuals using the software  
455 STRUCTURE: a simulation study. *Mol. Ecol.* 2005; 14: 2611–2620.
- 456 33. Latch EK, Rhodes OE. The effects of gene flow and population isolation on the genetic structure of  
457 reintroduced wild turkey populations: are genetics signatures of source populations retained? *Conservation*  
458 *Genetics.* 2005; 6: 981-997.
- 459 34. Waples R, Gaggiotti O. What is a population? An empirical evaluation of some genetic method for  
460 identifying the number of gene pools and their degree of connectivity. *Mol. Ecol.* 2006. 15:1419-1439.
- 461 35. Frantz A, Calgagno V, Mieuze L, Plantegenest M, Simon JC. Complex trait differentiation between host-  
462 populations of the pea aphid *Acyrtosiphon pisum* (Harris): implications for the evolution of ecological  
463 specialization. *Biol. J. Linn. Soc.* 2009. 97(4):718-727.
- 464 36. Earl, Dent A., et al. STRUCTURE HARVESTER: a website and program for visualizing STRUCTURE  
465 output and implementing the Evanno method. *Conservation genetics resources.* 2012; 4: 359-361.
- 466 37. Sanín MJ, Zapata P, Pintaud JC, Galeano G, Tohme J, Moller M. Up and down the blind alley: population  
467 divergence with scant gene flow in a tropical lineage of Andean palms (*Ceroxylon quindiuense* clade:  
468 *Ceroxyloideae*). *Journal of Heredity.* 2017; 108 (3): 288-298.
- 469 38. Trénel P, Hansen M, Normand S, Borchsenius F. History or landscape? Gene flow across the Andes,  
470 divergence-by-distance, and historical isolation in the Ecuadorian wax palm *Ceroxylon echinulatum*  
471 (Palmae). *Mol. Ecol.* 2008; 17: 3528–3540.
- 472 39. Sun G, Solomon B. Microsatellite variability and heterozygote deficiency in the artic-alpine Alaskan  
473 wheatgrass (*Elymus alaskanus*) complex. *Genome.* 2003; 46: 729-737.
- 474 40. Piñero D, et al. La diversidad genética como instrumento para la conservación y el aprovechamiento de la  
475 biodiversidad: estudios en especies mexicanas. In: *Capital natural de México. Vol. 1: Conocimiento actual de*  
476 *la biodiversidad.* México: CONABIO. 2008. pp. 437-494
- 477 41. Nora S, Albaladejo RG, González-Martínez SC, Robledo-Arnuncio JJ, Aparicio A. Movimiento de genes  
478 (polen y semillas) en poblaciones fragmentadas de plantas. *Ecosistemas.* 2011; 20: 35-45.
- 479 42. Torimaru T, Tani N, Tsumura Y, Nishimura N, Tomaru N. Effects of kin-structured seed dispersal on the  
480 genetic structure of the clonal dioecious shrub *Ilex leucoclada*. *Evolution.* 2007; 61:1289-1300.
- 481 43. Grivet D, Robledo-Arnuncio JJ, Smouse PE, Sork V. Relative contribution of contemporary pollen and seed  
482 dispersal to the effective parental size of seedling population of California valley oak (*Quercus lobata*, Née).  
483 *Mol. Ecol.* 2009; 18:3967-3979.
- 484 44. Kirejtshuk GA, Couturier G. Species of Mystropini (Coleoptera, Nitidulidae) associated with inflorescence  
485 of palm *Ceroxylon quindiuense* (Karst.) H. Wendl.(Arecaceae) from Peru. *Japanese Journal of Systematic*  
486 *Entomology.* 2009; 15(1), 57-77.
- 487 45. Rathcke BJ, Jules ES. Habitat fragmentation and plant–pollinator interactions. *Current Science.* 1993; 273-  
488 277.

- 489 46. Steffan-Dewenter I, Münzenberg U, Bürger C, Thies C, Tschamtk T. Scale-dependent effects of landscape  
490 context on three pollinator guilds. *Ecology*. 2002; 83(5), 1421-1432.
- 491 47. Westphal C, Steffan-Dewenter I, Tschamtk T. Bumblebees experience landscapes at different spatial  
492 scales: possible implications for coexistence. *Oecologia*. 2006; 149(2), 289-300.
- 493 48. Galetto L, Aguilar R, Musicante M, Astegiano J, Ferreras A, Jausoro M, Eynard C. Fragmentación de  
494 hábitat, riqueza de polinizadores, polinización y reproducción de plantas nativas en el Bosque Chaqueño de  
495 Córdoba, Argentina. *Ecología austral*. 2007; 17(1), 67-80.
- 496 49. Lowe WH, Allendorf FW. What can genetics tell us about population connectivity? *Mol Ecol*. 2010; 19(15),  
497 3038-3051.
- 498 50. McRae BH. Isolation by resistance. *Evolution*. 2006; 60 (8): 1551-1561.
- 499 51. McRae BH, Dickson BG, Keitt TH, Shah B. Using circuit theory to model connectivity in ecology, evolution,  
500 and conservation. *Ecology*. 2008; 89 (10): 2712-2724.
- 501 52. Matesanz S, Gimeno TE, of the Cruz M, Escudero A, Valladares F. Competition may explain the fine-scale  
502 spatial patterns and genetic structure of two co-occurring plant congeners. *Journal of Ecology*. 2011; 99: 838-  
503 848.
- 504 53. Petit R, El Mousadik A, Pons O. Identifying populations for conservation on the basis of genetic markers.  
505 *Conservation Biology*. 1998; 12: 844-855.
- 506 54. García-Merchán VH, Robainas-Barcia A, Abelló P, MacPherson E, Palero F, García-Rodríguez M, et al.  
507 Phylogeographic patterns of decapod crustaceans at the Atlantic–Mediterranean transition. *Mol Phylogenet*  
508 *Evol*. 2012; 62:664–672.
- 509 55. Pascual M, Palero F, García-Merchán VH, Macpherson E, Robainas-Barcia A, Mestres F. Roda T, et al.  
510 Temporal and spatial genetic differentiation in the crab *Liocarcinus depurator* across the Atlantic-  
511 Mediterranean transition. *Sci Rep*. 2016; 6:29892.
- 512 56. Poveda-Martínez D, Sosa C, Chacón-Vargas K, García-Merchán VH. Historical biogeography of five  
513 Characidium fish species: Dispersal from the Amazon Paleobasin to Southeastern South America. *PLoS*  
514 *ONE*. 2016; 11(10): e0164902.



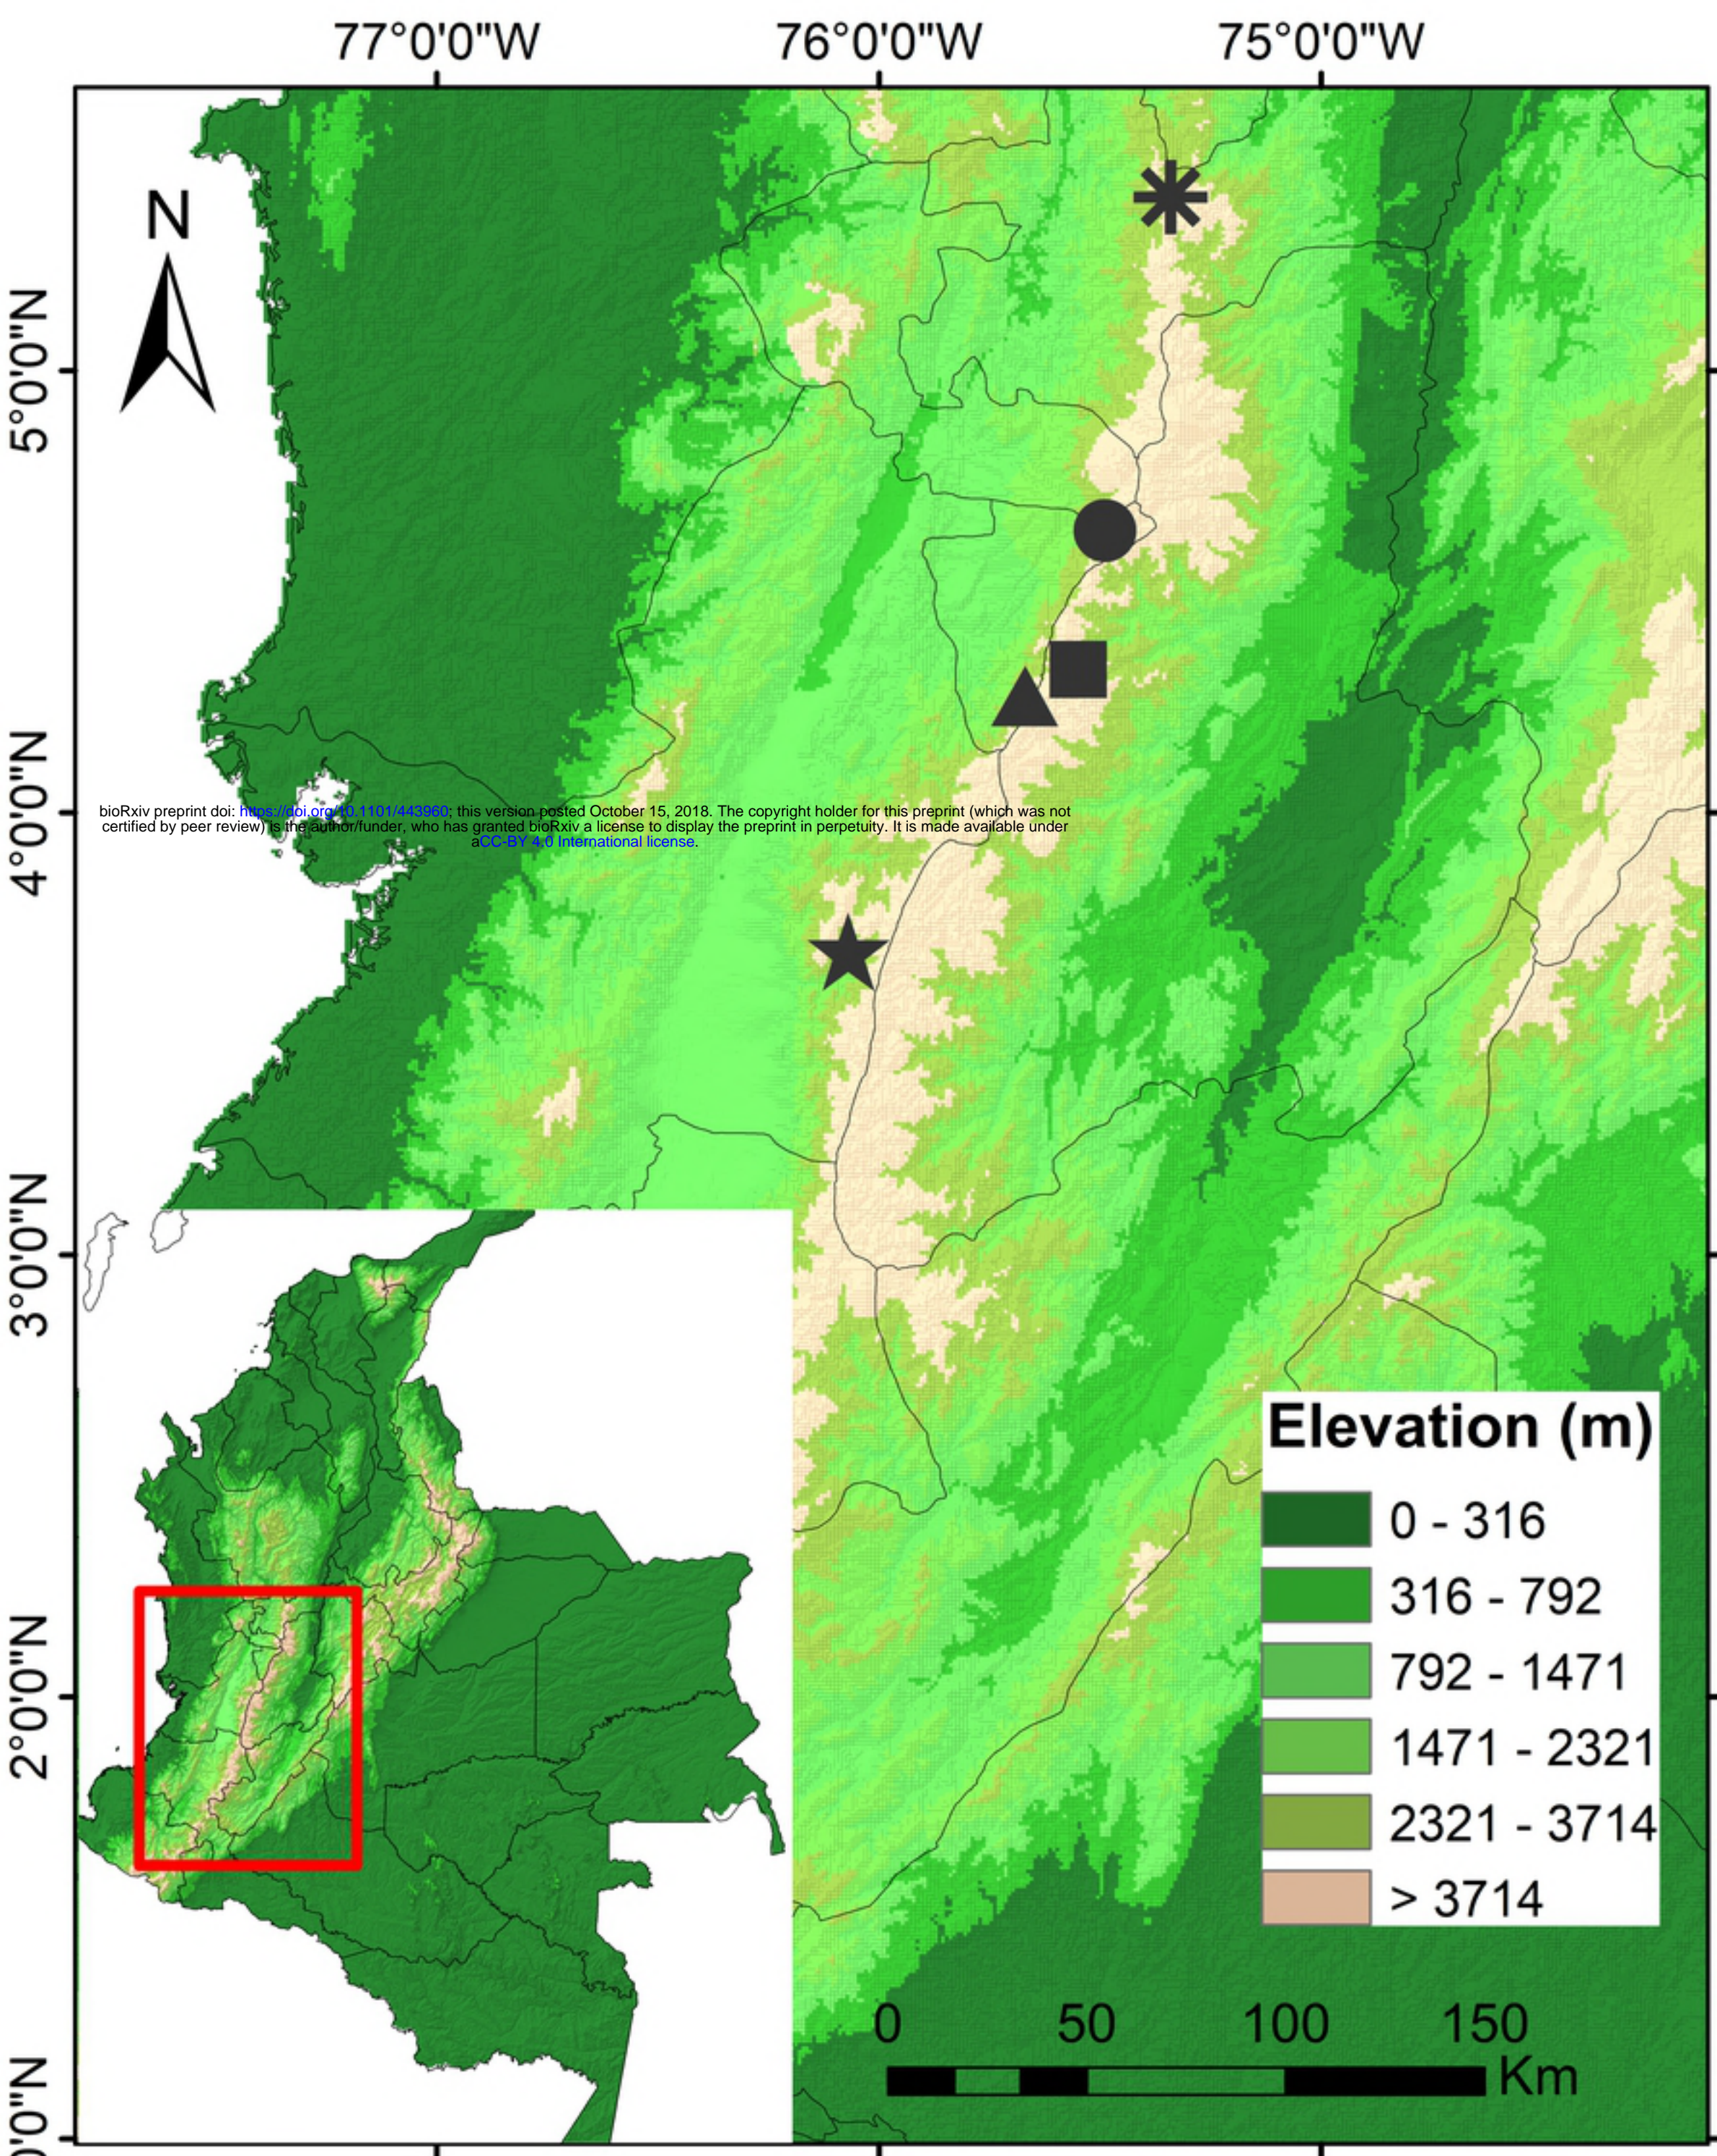

Figure 1



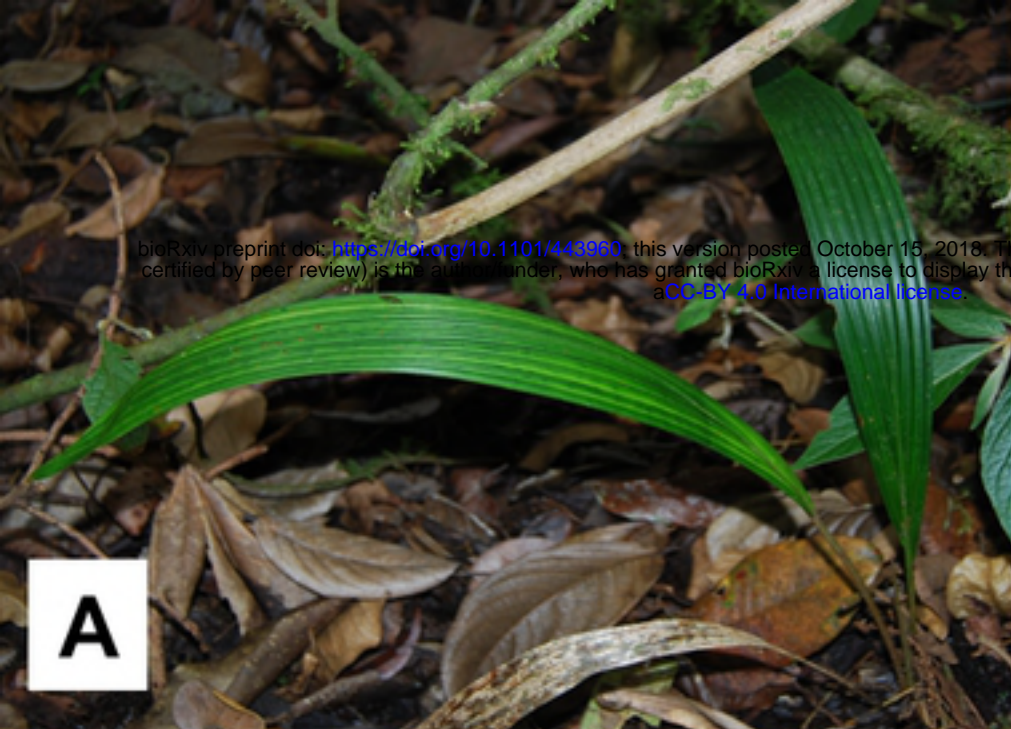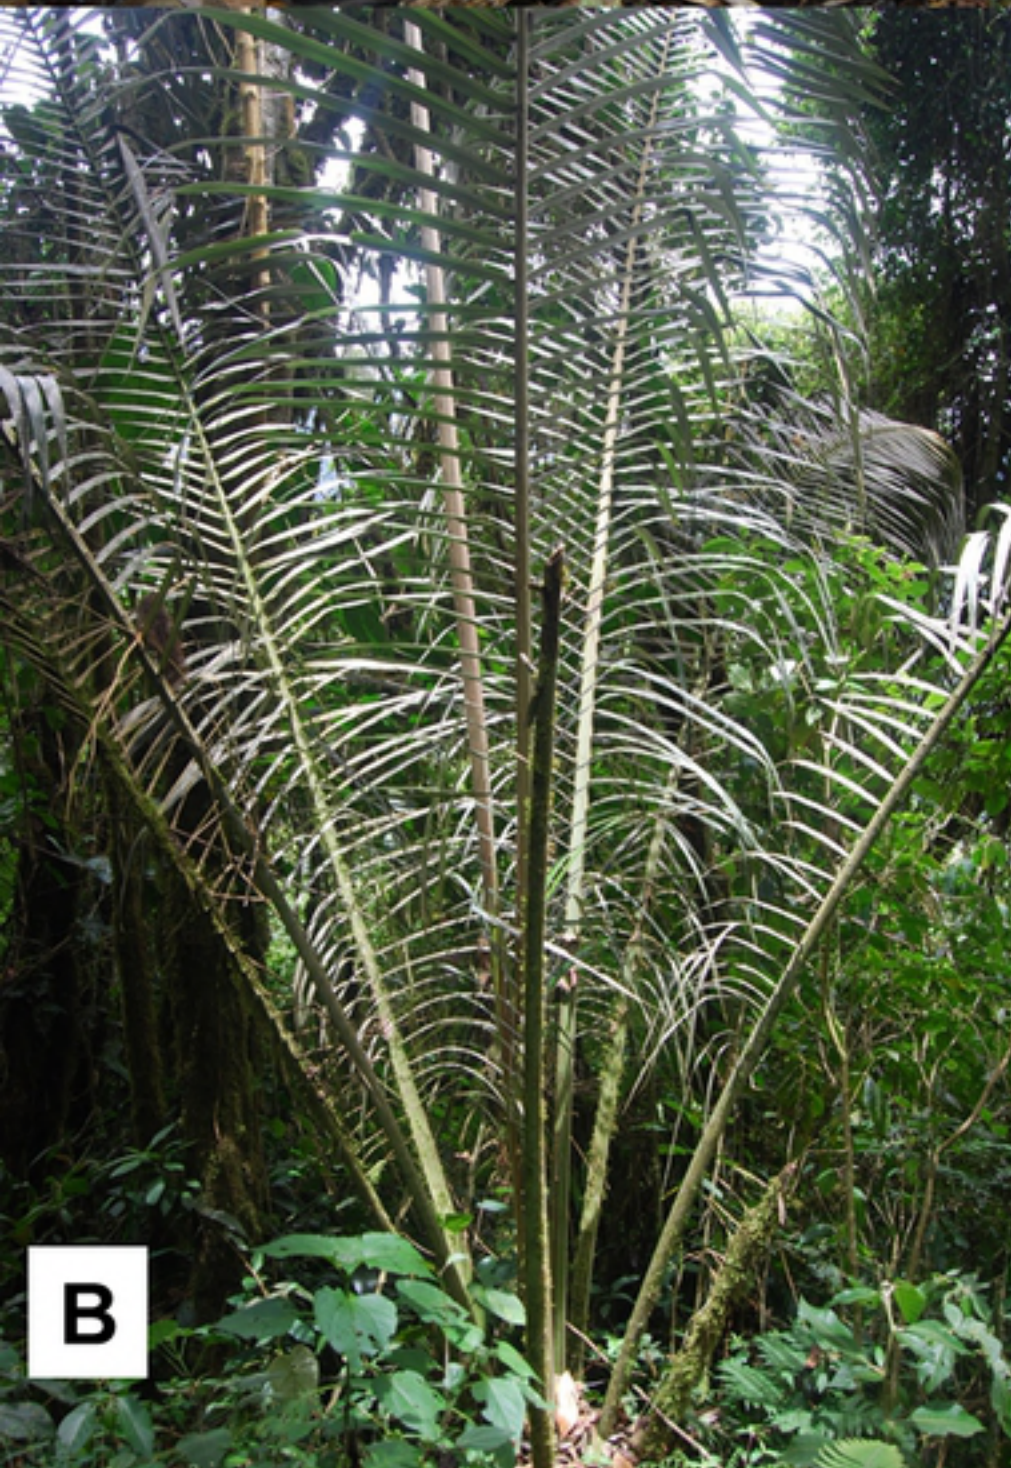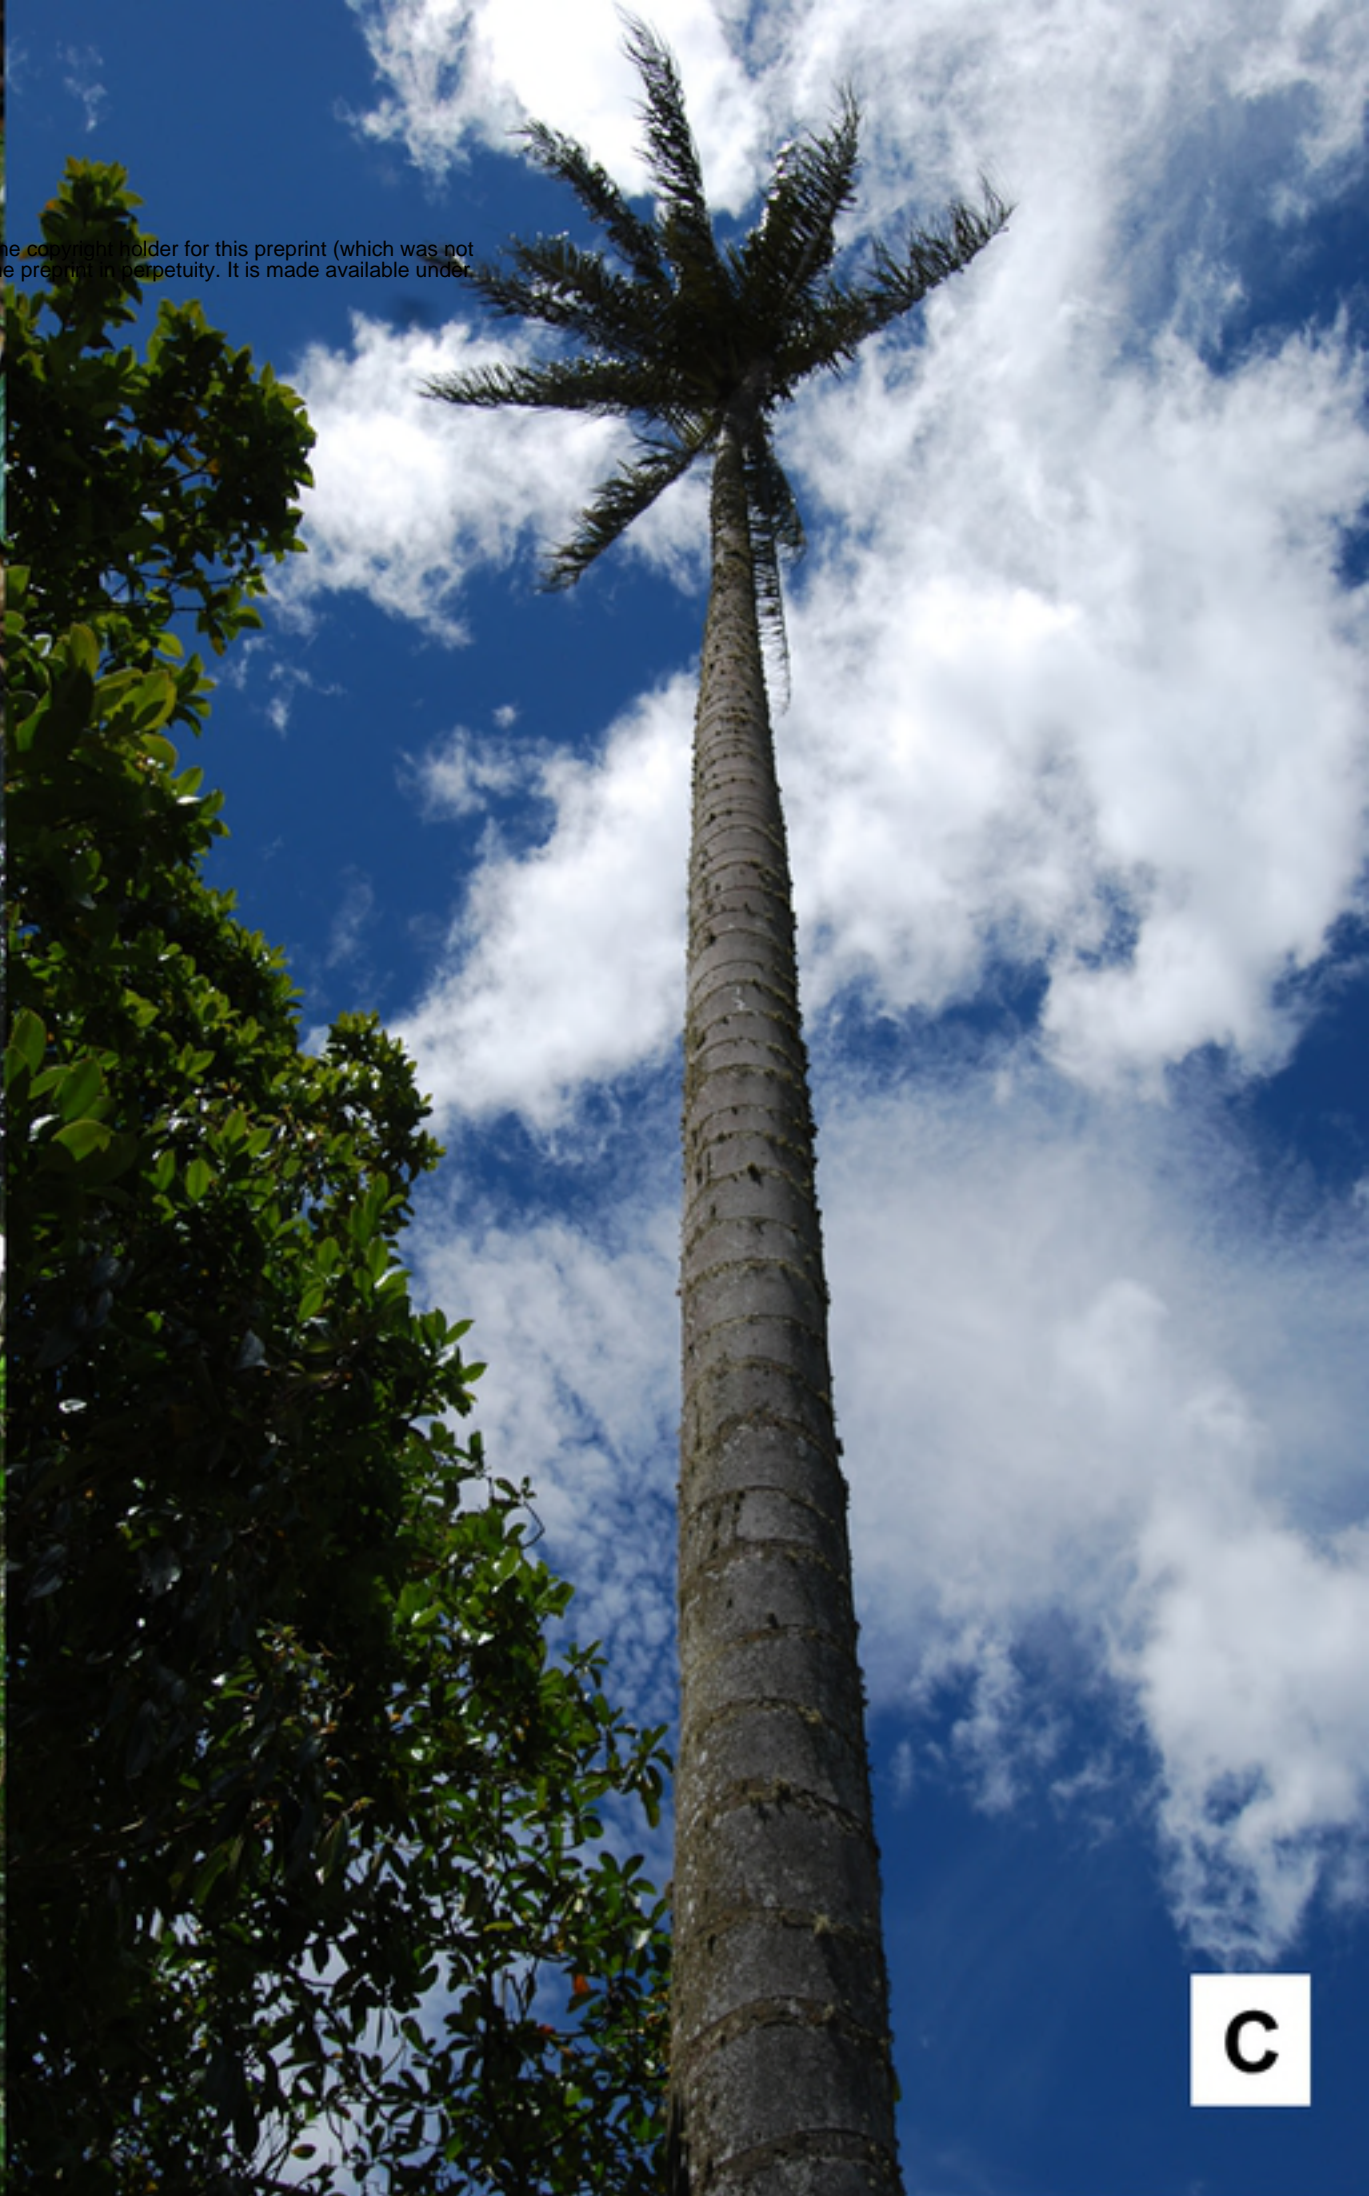

Figure 2



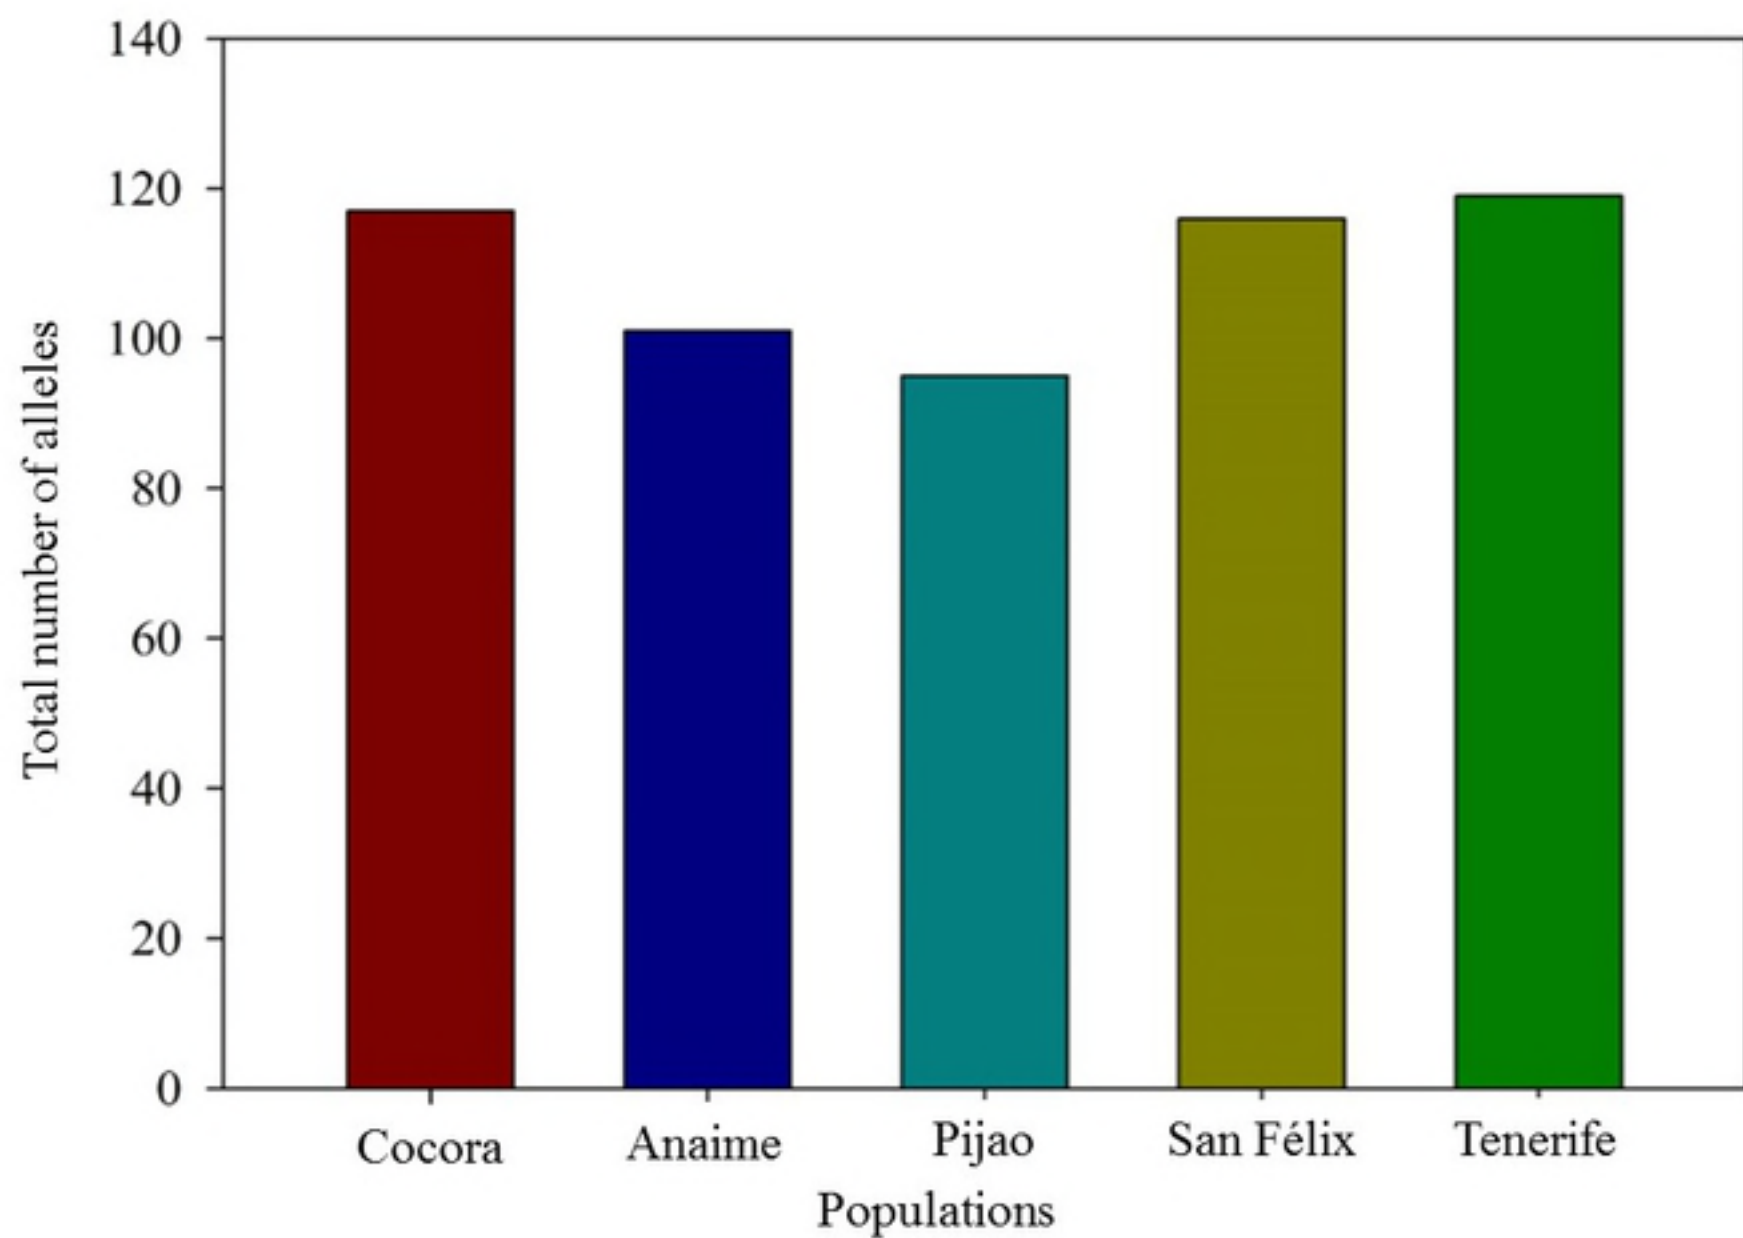

Figure 3

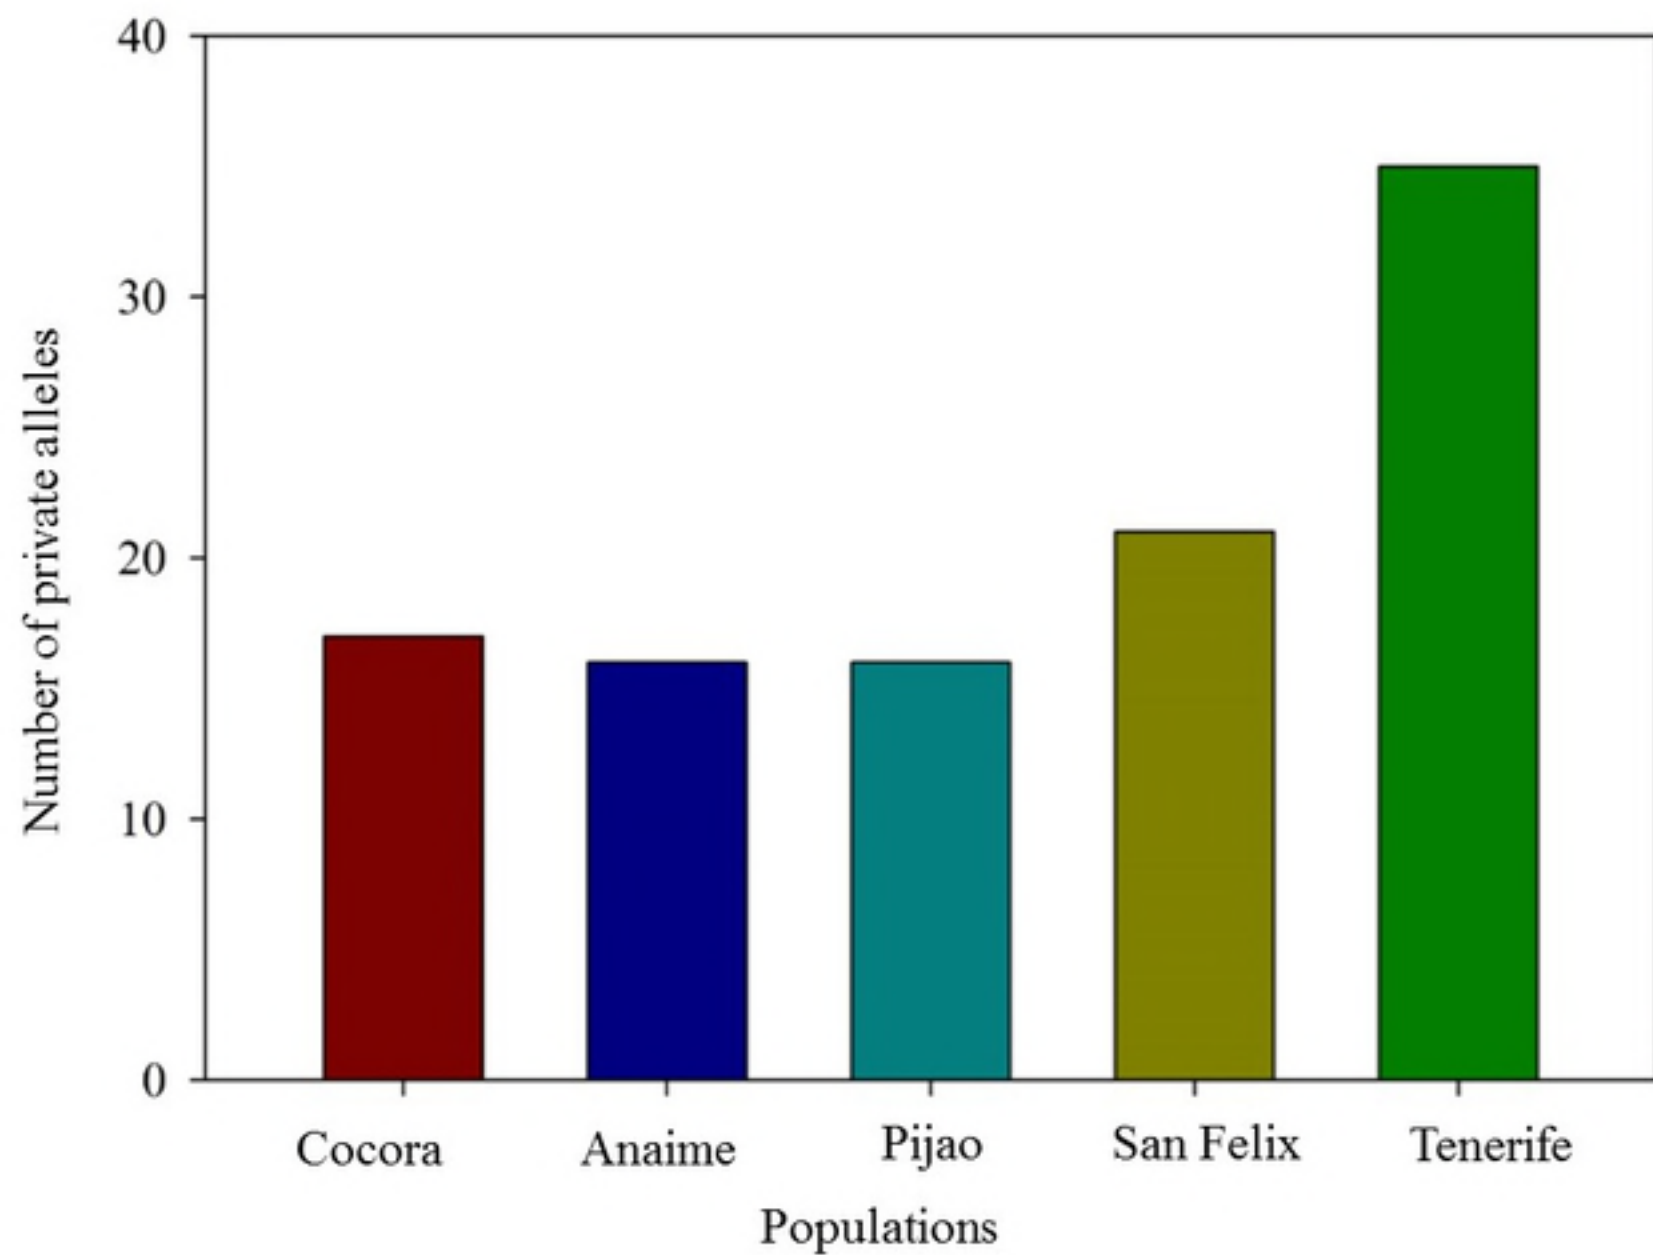

Figure 4

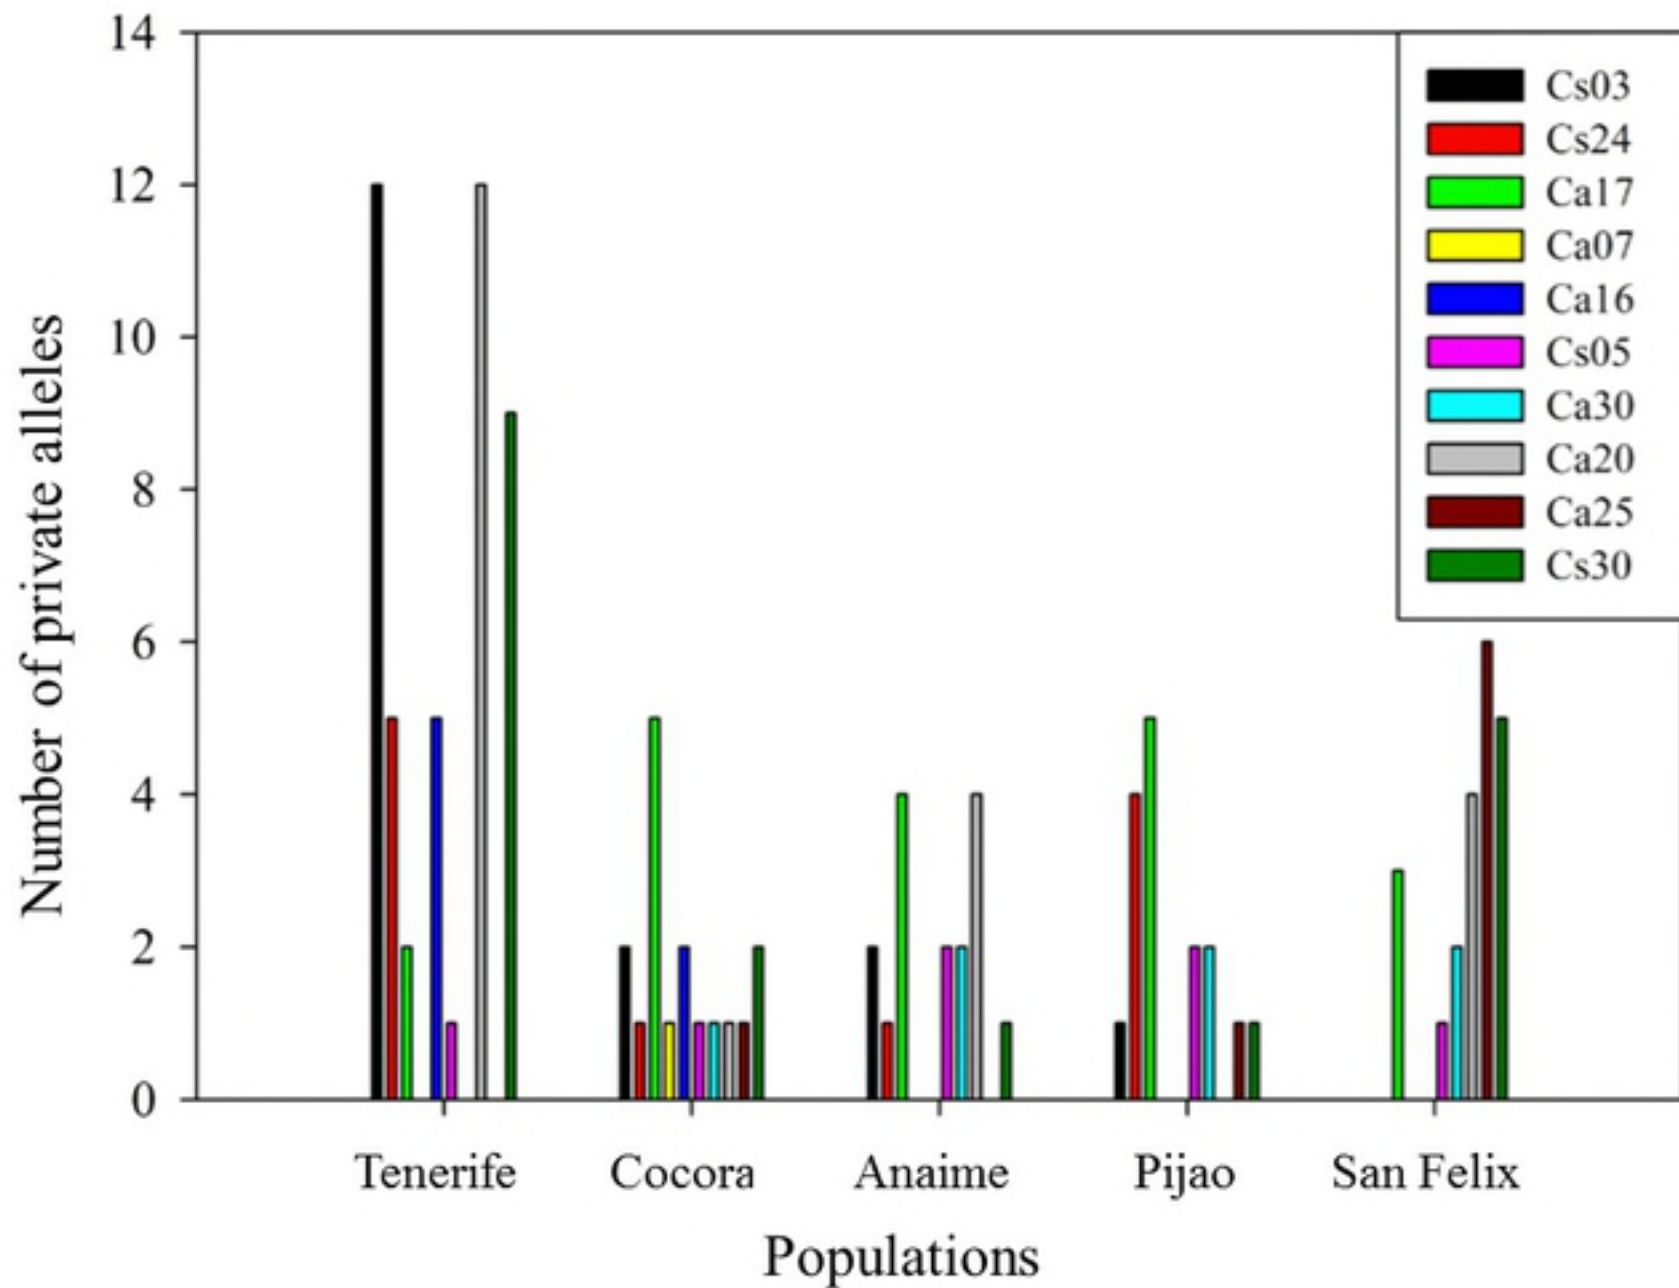

Figure 5



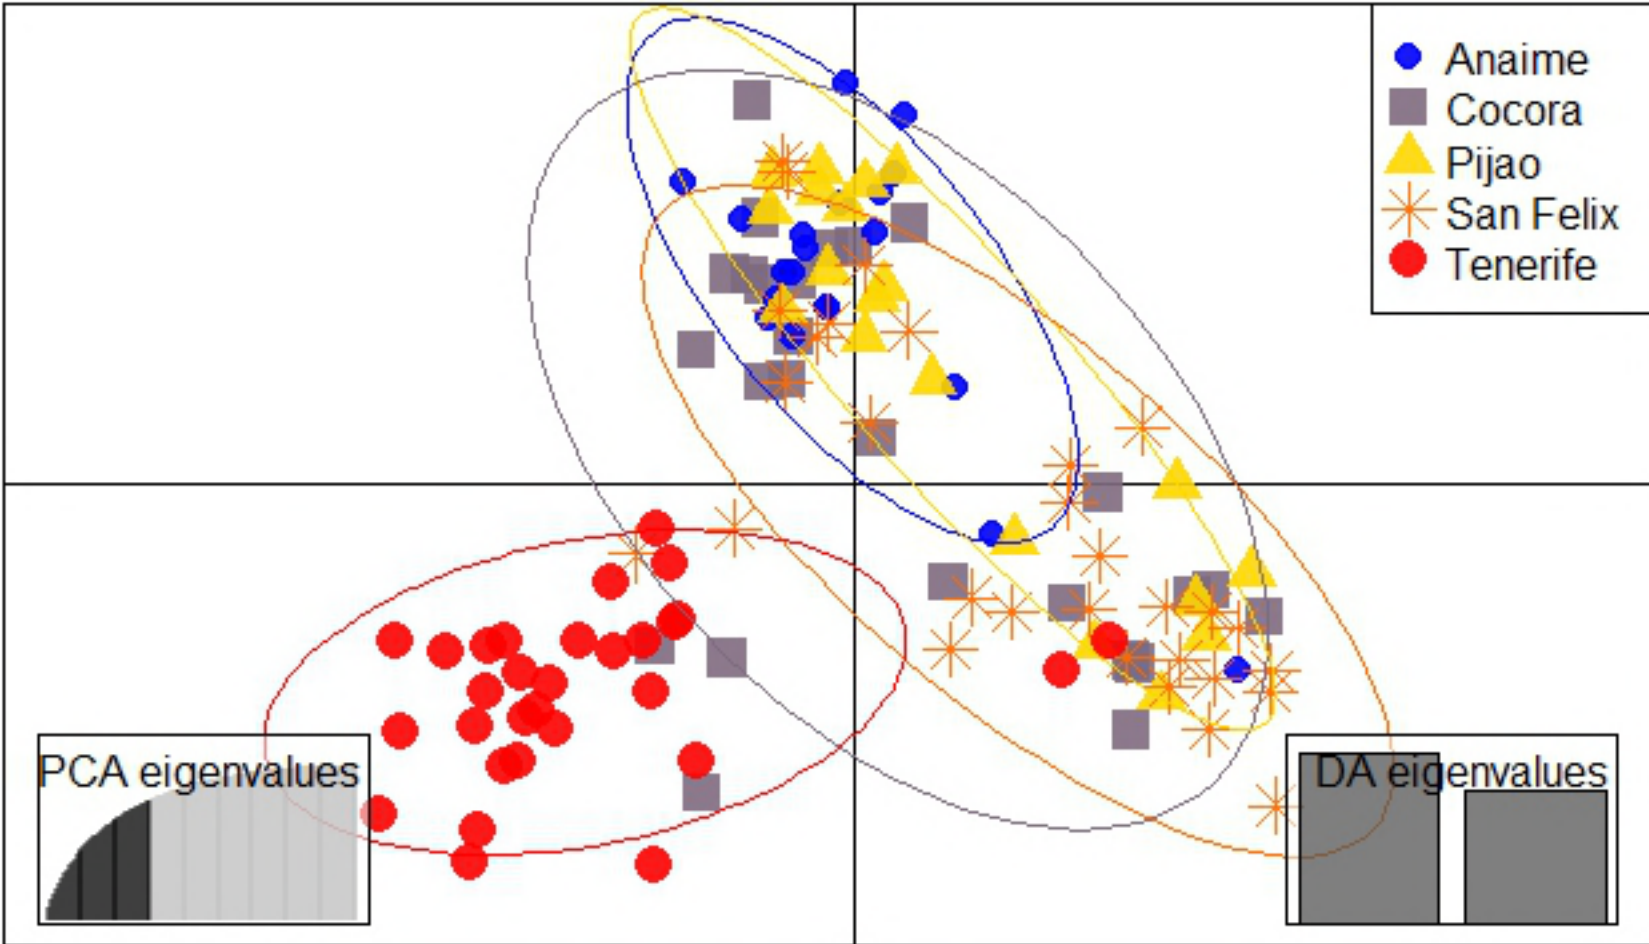

Figure 6

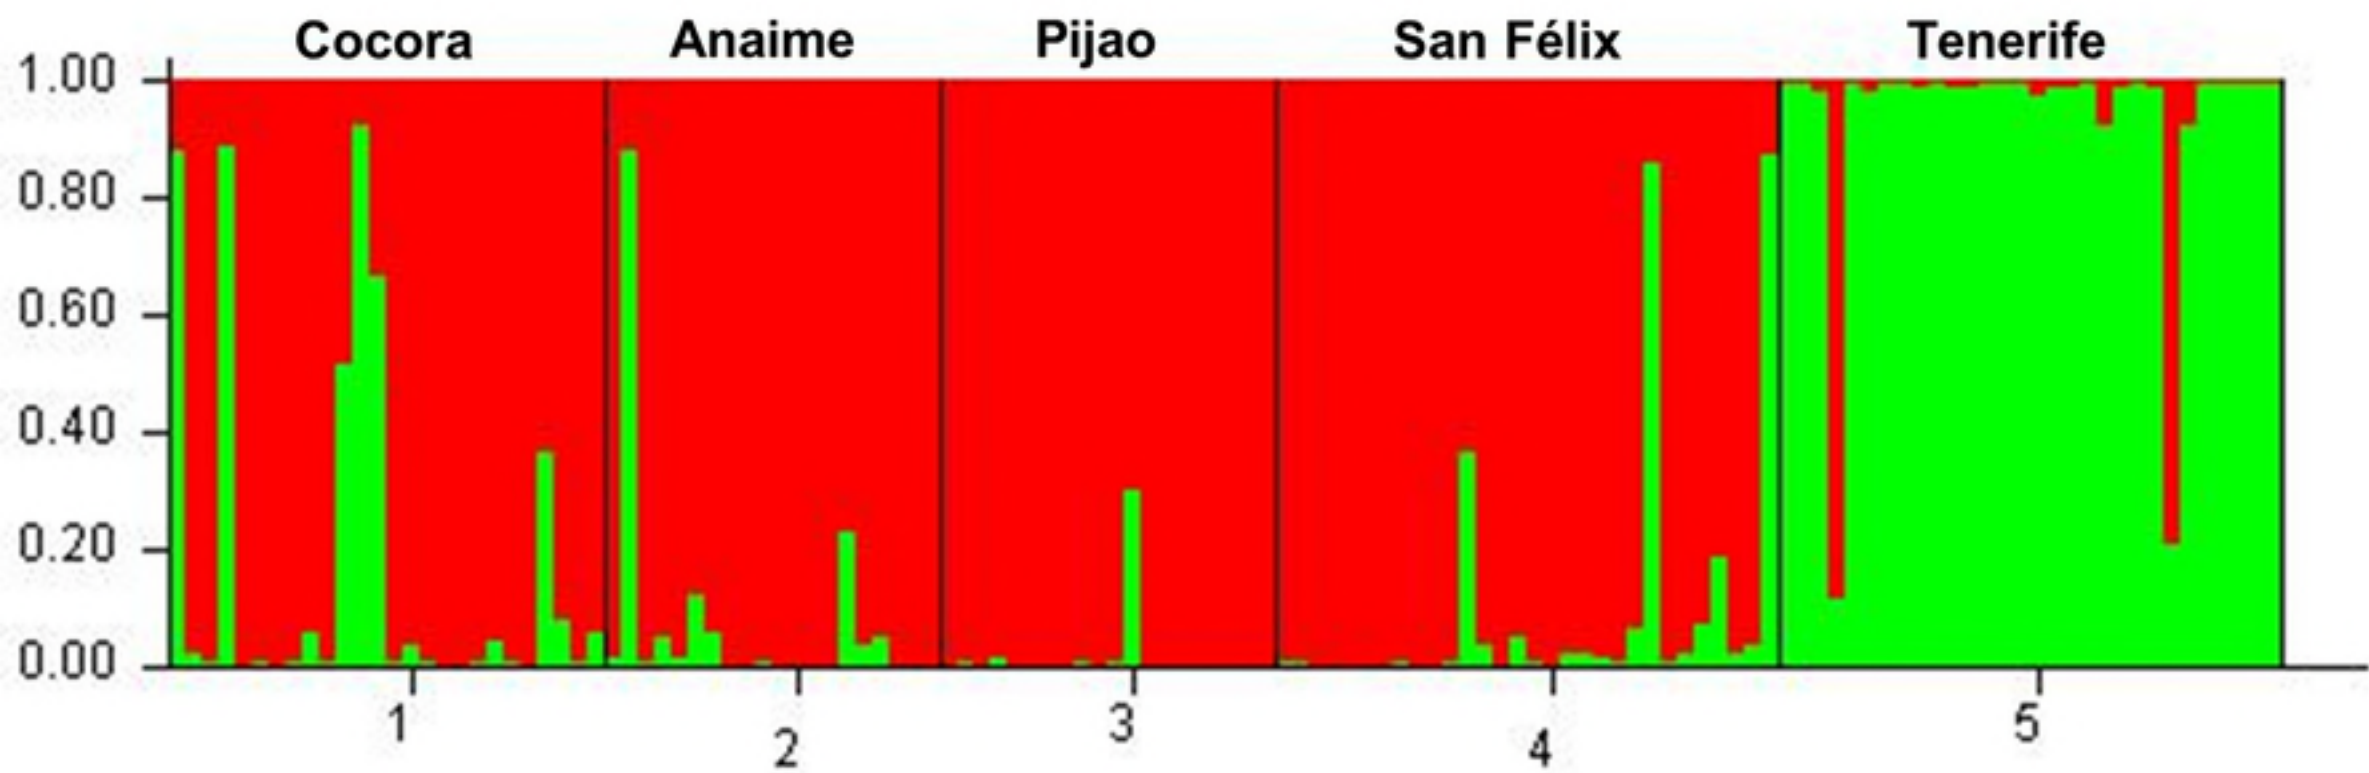

Figure 7
